# Supplementary material for: Comparative Genome Analysis Reveals an Absence of Leucine-Rich Repeat Pattern-Recognition Receptor Proteins in the Kingdom Fungi
Source: PLoS One. 2010 Sep 14;5(9):e12725. doi: 10.1371/journal.pone.0012725 (PMC2939053; doi:10.1371/journal.pone.0012725)
Supplement: Table S1 — Species used in this study (0.02 MB XLS) [file pone.0012725.s004.xls]

## Sheet: species
Table S1 - Species used in this study
Species	Phylogenetic group	Source
Cryptosporidium parvum	alveolate	http://www.ncbi.nlm.nih.gov/
Paramecium tetraurelia	alveolate	http://www.ncbi.nlm.nih.gov/
Plasmodium yoelii	alveolate	http://www.tigr.org
Tetrahymena thermophila	alveolate	http://www.tigr.org
Toxoplasma gondii	alveolate	http://www.tigr.org
Dictyostelium discoideum	amoebozoa	http://www.ncbi.nlm.nih.gov/
Dictyostelium purpureum	amoebozoa	http://genome.jgi-psf.org/
Entamoeba histolytica	amoebozoa	http://www.tigr.org
Chlamydomonas reinhardtii	chlorophyte	http://genome.jgi-psf.org/
Chlorella NC64A	chlorophyte	http://genome.jgi-psf.org/
Micromonas pusilla	chlorophyte	http://genome.jgi-psf.org/
Micromonas strain RCC299	chlorophyte	http://genome.jgi-psf.org/
Ostreococcus lucimarinus	chlorophyte	http://genome.jgi-psf.org/
Ostreococcus RCC809	chlorophyte	http://genome.jgi-psf.org/
Ostreococcus tauri	chlorophyte	http://genome.jgi-psf.org/
Volvox carteri	chlorophyte	http://genome.jgi-psf.org/
Giardia lamblia	excavate	http://www.ncbi.nlm.nih.gov/
Leishmania major	excavate	http://www.sanger.ac.uk/
Naegleria gruberi	excavate	http://genome.jgi-psf.org/
Trichomonas vaginalis	excavate	http://www.ncbi.nlm.nih.gov/
Trypanosoma brucei	excavate	http://www.ncbi.nlm.nih.gov/
Trypanosoma cruzi	excavate	http://www.ncbi.nlm.nih.gov/
Aspergillus clavatus	fungi	http://www.broad.mit.edu/
Aspergillus flavus	fungi	http://www.broad.mit.edu/
Aspergillus fumigatus	fungi	http://www.broad.mit.edu/
Aspergillus nidulans	fungi	http://www.broad.mit.edu/
Aspergillus niger	fungi	http://www.broad.mit.edu/
Aspergillus oryzae	fungi	http://www.broad.mit.edu/
Aspergillus terreus	fungi	http://www.broad.mit.edu/
Batrachochytrium dendrobatidis	fungi	http://www.broad.mit.edu/
Botrytis cinerea	fungi	http://www.broad.mit.edu/
Candida albicans SC5314	fungi	http://www.broad.mit.edu/
Chaetomium globosum	fungi	http://www.broad.mit.edu/
Coccidioides immitis	fungi	http://www.broad.mit.edu/
Coccidioides posadasii	fungi	http://www.broad.mit.edu/
Cochliobolus heterostrophus	fungi	http://genome.jgi-psf.org/
Coprinus cinereus	fungi	http://www.broad.mit.edu/
Cryptococcus neoformans	fungi	http://www.broad.mit.edu/
Encephalitozoon cuniculi	fungi	http://www.ncbi.nlm.nih.gov/
Fusarium graminearum	fungi	http://www.broad.mit.edu/
Fusarium oxysporum	fungi	http://www.broad.mit.edu/
Fusarium verticillioides	fungi	http://www.broad.mit.edu/
Histoplasma capsulatum	fungi	http://www.broad.mit.edu/
Laccaria bicolor	fungi	http://genome.jgi-psf.org/
Magnaporthe grisea	fungi	http://www.broad.mit.edu/
Mucor circinelloides	fungi	http://genome.jgi-psf.org/
Mycosphaerella fijiensis	fungi	http://genome.jgi-psf.org/
Mycosphaerella graminicola	fungi	http://genome.jgi-psf.org/
Nectria haematococca	fungi	http://www.broad.mit.edu/
Neosartorya fischeri	fungi	http://www.broad.mit.edu/
Neurospora crassa	fungi	http://www.broad.mit.edu/
Paracoccidioides brasiliensis	fungi	http://www.broad.mit.edu/
Phanerochaete chrysosporium	fungi	http://genome.jgi-psf.org/
Phycomyces blakesleeanus	fungi	http://genome.jgi-psf.org/
Pichia stipitis	fungi	http://genome.jgi-psf.org/
Podospora anserina	fungi	http://podospora.igmors.u-psud.fr/
Postia placenta	fungi	http://genome.jgi-psf.org/
Puccinia graminis	fungi	http://www.broad.mit.edu/
Pyrenophora tritici-repentis	fungi	http://www.broad.mit.edu/
Rhizopus oryzae	fungi	http://www.broad.mit.edu/
Saccharomyces cerevisiae	fungi	http://www.ncbi.nlm.nih.gov/
Schizosaccharomyces pombe	fungi	http://www.ncbi.nlm.nih.gov/
Sclerotinia sclerotiorum	fungi	http://www.broad.mit.edu/
Sporobolomyces roseus	fungi	http://genome.jgi-psf.org/
Stagonospora nodorum	fungi	http://www.broad.mit.edu/
Trichoderma atoviride	fungi	http://genome.jgi-psf.org/
Trichoderma reesei	fungi	http://genome.jgi-psf.org/
Trichoderma virens	fungi	http://genome.jgi-psf.org/
Uncinocarpus reesii	fungi	http://www.broad.mit.edu/
Ustilago maydis	fungi	http://www.broad.mit.edu/
Yarrowia lipolytica	fungi	http://www.ncbi.nlm.nih.gov/
Emiliania huxleyi	haptophyte	http://genome.jgi-psf.org/
Caenorhabditis elegans	metazoa	http://www.ncbi.nlm.nih.gov/
Capitella sp. I	metazoa	http://genome.jgi-psf.org/
Ciona intestinalis	metazoa	http://genome.jgi-psf.org/
Daphnia pulex	metazoa	http://genome.jgi-psf.org/
Drosophila melanogaster	metazoa	http://www.ncbi.nlm.nih.gov/
Gallus gallus	metazoa	http://www.ncbi.nlm.nih.gov/
Helobdella robusta	metazoa	http://genome.jgi-psf.org/
Homo sapiens	metazoa	http://www.ncbi.nlm.nih.gov/
Lottia gigantea	metazoa	http://genome.jgi-psf.org/
Monosiga brevicollis	metazoa	http://genome.jgi-psf.org/
Mus musculus	metazoa	http://www.ncbi.nlm.nih.gov/
Nematostella vectensis	metazoa	http://genome.jgi-psf.org/
Takifugu rubripes	metazoa	http://genome.jgi-psf.org/
Trichoplax adhaerens	metazoa	http://genome.jgi-psf.org/
Xenopus tropicalis	metazoa	http://genome.jgi-psf.org/
Hyaloperonospora parasitica	oomycete	http://genome.wustl.edu/
Phytophthora infestans	oomycete	http://www.broad.mit.edu/
Phytophthora ramorum	oomycete	http://genome.jgi-psf.org/
Phytophthora sojae	oomycete	http://genome.jgi-psf.org/
Arabidopsis thaliana	plant	http://www.ncbi.nlm.nih.gov/
Oryza sativa	plant	http://www.ncbi.nlm.nih.gov/
Physcomitrella patens	plant	http://genome.jgi-psf.org/
Populus trichocarpa	plant	http://genome.jgi-psf.org/
Selaginella moellendorffii	plant	http://genome.jgi-psf.org/
Sorghum bicolor	plant	http://genome.jgi-psf.org/
Cyanidioschyzon merolae	rhodophyte	http://merolae.biol.s.u-tokyo.ac.jp/
Aureococcus anophagefferens	stramenopile	http://genome.jgi-psf.org/
Phaeodactylum tricornutum	stramenopile	http://genome.jgi-psf.org/
Thalassiosira pseudonana	stramenopile	http://genome.jgi-psf.org/
