# Supplementary material for: Comparative Genome Analysis Reveals an Absence of Leucine-Rich Repeat Pattern-Recognition Receptor Proteins in the Kingdom Fungi
Source: PLoS One. 2010 Sep 14;5(9):e12725. doi: 10.1371/journal.pone.0012725 (PMC2939053; doi:10.1371/journal.pone.0012725)
Supplement: Table S2 — The number of LRR-domain containing proteins identified in each species (0.02 MB XLS) [file pone.0012725.s005.xls]

## Sheet: count_LRR
Table S2 - The number of LRR-domain containing proteins identified in each species
Species	Phylogenetic group	Number of proteins
Cryptosporidium parvum	alveolate	5
Paramecium tetraurelia	alveolate	124
Plasmodium yoelii	alveolate	12
Tetrahymena thermophila	alveolate	83
Toxoplasma gondii	alveolate	17
Dictyostelium discoideum	amoebozoa	61
Dictyostelium purpureum	amoebozoa	59
Entamoeba histolytica	amoebozoa	42
Chlamydomonas reinhardtii	chlorophyte	57
Chlorella NC64A	chlorophyte	60
Micromonas pusilla	chlorophyte	33
Micromonas strain RCC299	chlorophyte	80
Ostreococcus lucimarinus	chlorophyte	13
Ostreococcus RCC809	chlorophyte	13
Ostreococcus tauri	chlorophyte	15
Volvox carteri	chlorophyte	57
Giardia lamblia	excavate	19
Leishmania major	excavate	63
Naegleria gruberi	excavate	157
Trichomonas vaginalis	excavate	50
Trypanosoma brucei	excavate	45
Trypanosoma cruzi	excavate	63
Aspergillus clavatus	fungi	9
Aspergillus flavus	fungi	9
Aspergillus fumigatus	fungi	9
Aspergillus nidulans	fungi	9
Aspergillus niger	fungi	10
Aspergillus oryzae	fungi	9
Aspergillus terreus	fungi	8
Batrachochytrium dendrobatidis	fungi	33
Botrytis cinerea	fungi	7
Candida albicans SC5314	fungi	19
Chaetomium globosum	fungi	9
Coccidioides immitis	fungi	9
Coccidioides posadasii	fungi	10
Cochliobolus heterostrophus	fungi	10
Coprinus cinereus	fungi	11
Cryptococcus neoformans	fungi	11
Encephalitozoon cuniculi	fungi	9
Fusarium graminearum	fungi	11
Fusarium oxysporum	fungi	13
Fusarium verticillioides	fungi	11
Histoplasma capsulatum	fungi	7
Laccaria bicolor	fungi	14
Magnaporthe grisea	fungi	9
Mucor circinelloides	fungi	21
Mycosphaerella fijiensis	fungi	6
Mycosphaerella graminicola	fungi	11
Nectria haematococca	fungi	13
Neosartorya fischeri	fungi	8
Neurospora crassa	fungi	11
Paracoccidioides brasiliensis	fungi	9
Phanerochaete chrysosporium	fungi	10
Phycomyces blakesleeanus	fungi	22
Pichia stipitis	fungi	14
Podospora anserina	fungi	13
Postia placenta	fungi	37
Puccinia graminis	fungi	10
Pyrenophora tritici-repentis	fungi	8
Rhizopus oryzae	fungi	21
Saccharomyces cerevisiae	fungi	6
Schizosaccharomyces pombe	fungi	9
Sclerotinia sclerotiorum	fungi	10
Sporobolomyces roseus	fungi	9
Stagonospora nodorum	fungi	9
Trichoderma atoviride	fungi	8
Trichoderma reesei	fungi	9
Trichoderma virens	fungi	9
Uncinocarpus reesii	fungi	9
Ustilago maydis	fungi	11
Yarrowia lipolytica	fungi	7
Emiliania huxleyi	haptophyte	81
Caenorhabditis elegans	metazoa	58
Capitella sp. I	metazoa	344
Ciona intestinalis	metazoa	106
Daphnia pulex	metazoa	83
Drosophila melanogaster	metazoa	131
Gallus gallus	metazoa	161
Helobdella robusta	metazoa	102
Homo sapiens	metazoa	242
Lottia gigantea	metazoa	124
Monosiga brevicollis	metazoa	54
Mus musculus	metazoa	249
Nematostella vectensis	metazoa	97
Takifugu rubripes	metazoa	400
Trichoplax adhaerens	metazoa	105
Xenopus tropicalis	metazoa	208
Hyaloperonospora parasitica	oomycete	8
Phytophthora infestans	oomycete	61
Phytophthora ramorum	oomycete	48
Phytophthora sojae	oomycete	54
Arabidopsis thaliana	plant	700
Oryza sativa	plant	518
Physcomitrella patens	plant	265
Populus trichocarpa	plant	1115
Selaginella moellendorffii	plant	260
Sorghum bicolor	plant	568
Cyanidioschyzon merolae	rhodophyte	8
Aureococcus anophagefferens	stramenopile	60
Phaeodactylum tricornutum	stramenopile	43
Thalassiosira pseudonana	stramenopile	54
