# Supplementary material for: Comparative Genome Analysis Reveals an Absence of Leucine-Rich Repeat Pattern-Recognition Receptor Proteins in the Kingdom Fungi
Source: PLoS One. 2010 Sep 14;5(9):e12725. doi: 10.1371/journal.pone.0012725 (PMC2939053; doi:10.1371/journal.pone.0012725)
Supplement: Table S3 — The number of LRR-receptors identified in each species (0.02 MB XLS) [file pone.0012725.s006.xls]

## Sheet: count_LRR_receptor
Table S3 - The number of LRR-receptors identified in each species
Species	Phylogenetic group	Number of proteins
Cryptosporidium parvum	alveolate	0
Paramecium tetraurelia	alveolate	0
Plasmodium yoelii	alveolate	0
Tetrahymena thermophila	alveolate	0
Toxoplasma gondii	alveolate	0
Dictyostelium discoideum	amoebozoa	5
Dictyostelium purpureum	amoebozoa	5
Entamoeba histolytica	amoebozoa	2
Chlamydomonas reinhardtii	chlorophyte	2
Chlorella NC64A	chlorophyte	8
Micromonas pusilla	chlorophyte	1
Micromonas strain RCC299	chlorophyte	3
Ostreococcus lucimarinus	chlorophyte	0
Ostreococcus RCC809	chlorophyte	1
Ostreococcus tauri	chlorophyte	0
Volvox carteri	chlorophyte	2
Giardia lamblia	excavate	2
Leishmania major	excavate	17
Naegleria gruberi	excavate	2
Trichomonas vaginalis	excavate	3
Trypanosoma brucei	excavate	0
Trypanosoma cruzi	excavate	1
Aspergillus clavatus	fungi	0
Aspergillus flavus	fungi	0
Aspergillus fumigatus	fungi	0
Aspergillus nidulans	fungi	0
Aspergillus niger	fungi	0
Aspergillus oryzae	fungi	0
Aspergillus terreus	fungi	0
Batrachochytrium dendrobatidis	fungi	2
Botrytis cinerea	fungi	0
Candida albicans SC5314	fungi	0
Chaetomium globosum	fungi	0
Coccidioides immitis	fungi	0
Coccidioides posadasii	fungi	0
Cochliobolus heterostrophus	fungi	0
Coprinus cinereus	fungi	0
Cryptococcus neoformans	fungi	1
Encephalitozoon cuniculi	fungi	0
Fusarium graminearum	fungi	0
Fusarium oxysporum	fungi	0
Fusarium verticillioides	fungi	0
Histoplasma capsulatum	fungi	0
Laccaria bicolor	fungi	0
Magnaporthe grisea	fungi	0
Mucor circinelloides	fungi	0
Mycosphaerella fijiensis	fungi	1
Mycosphaerella graminicola	fungi	0
Nectria haematococca	fungi	0
Neosartorya fischeri	fungi	0
Neurospora crassa	fungi	0
Paracoccidioides brasiliensis	fungi	0
Phanerochaete chrysosporium	fungi	0
Phycomyces blakesleeanus	fungi	1
Pichia stipitis	fungi	0
Podospora anserina	fungi	0
Postia placenta	fungi	1
Puccinia graminis	fungi	0
Pyrenophora tritici-repentis	fungi	0
Rhizopus oryzae	fungi	1
Saccharomyces cerevisiae	fungi	0
Schizosaccharomyces pombe	fungi	0
Sclerotinia sclerotiorum	fungi	0
Sporobolomyces roseus	fungi	0
Stagonospora nodorum	fungi	0
Trichoderma atoviride	fungi	0
Trichoderma reesei	fungi	0
Trichoderma virens	fungi	0
Uncinocarpus reesii	fungi	0
Ustilago maydis	fungi	0
Yarrowia lipolytica	fungi	0
Emiliania huxleyi	haptophyte	0
Caenorhabditis elegans	metazoa	17
Capitella sp. I	metazoa	30
Ciona intestinalis	metazoa	21
Daphnia pulex	metazoa	21
Drosophila melanogaster	metazoa	50
Gallus gallus	metazoa	49
Helobdella robusta	metazoa	17
Homo sapiens	metazoa	82
Lottia gigantea	metazoa	19
Monosiga brevicollis	metazoa	11
Mus musculus	metazoa	88
Nematostella vectensis	metazoa	2
Takifugu rubripes	metazoa	95
Trichoplax adhaerens	metazoa	4
Xenopus tropicalis	metazoa	75
Hyaloperonospora parasitica	oomycete	1
Phytophthora infestans	oomycete	9
Phytophthora ramorum	oomycete	6
Phytophthora sojae	oomycete	11
Arabidopsis thaliana	plant	269
Oryza sativa	plant	235
Physcomitrella patens	plant	102
Populus trichocarpa	plant	431
Selaginella moellendorffii	plant	87
Sorghum bicolor	plant	265
Cyanidioschyzon merolae	rhodophyte	1
Aureococcus anophagefferens	stramenopile	1
Phaeodactylum tricornutum	stramenopile	7
Thalassiosira pseudonana	stramenopile	5
