# Supplementary material for: Comparative Genome Analysis Reveals an Absence of Leucine-Rich Repeat Pattern-Recognition Receptor Proteins in the Kingdom Fungi
Source: PLoS One. 2010 Sep 14;5(9):e12725. doi: 10.1371/journal.pone.0012725 (PMC2939053; doi:10.1371/journal.pone.0012725)
Supplement: Table S5 — LRR domain proteins containing a signal peptide in fungi (0.02 MB XLS) [file pone.0012725.s008.xls]

## Sheet: LRR_info_sigP_fungi
Table S5 - LRR domain proteins containing a signal peptide in fungi
protein ID	Species	Protein domains (Pfam)	Top BLAST P hit v Swiss-Prot (e-value cut-off 1e-5)
19171390	Encephalitozoon cuniculi	Leucine Rich Repeat (PF00560) 68->89, Leucine Rich Repeat (PF00560) 91->112, Leucine Rich Repeat (PF00560) 114->135
BDEG00798	Batrachochytrium dendrobatidis	Protein tyrosine kinase (PF07714) 302->498, Leucine Rich Repeat (PF00560) 856->878, Leucine Rich Repeat (PF00560) 880->902	gi|2851597|sp|P25848.3|PHY1_CERPU Light-sensor Protein kinase; Includes: Phytochrome; Includes: Protein kinase (1e-22)
CC1G_06630	Coprinus cinereus	Leucine Rich Repeat (PF00560) 50->72, Leucine Rich Repeat (PF00560) 107->131, Leucine Rich Repeat (PF00560) 140->160, Leucine Rich Repeat (PF00560) 174->195	None
Muci92600	Mucor circinelloides	Leucine Rich Repeat (PF00560) 161->183, Leucine Rich Repeat (PF00560) 185->207, Leucine Rich Repeat (PF00560) 209->231, Leucine Rich Repeat (PF00560) 233->255, Leucine Rich Repeat (PF00560) 257->279, Leucine Rich Repeat (PF00560) 329->351, Leucine Rich Repeat (PF00560) 353->375	gi|46396756|sp|P93194.2|RPK1_IPONI Receptor-like protein kinase; Flags: Precursor (1e-37)
Mycgr43911	Mycosphaerella graminicola	Leucine rich repeat N-terminal domain (PF08263) 36->76, Leucine Rich Repeat (PF00560) 137->160, Leucine Rich Repeat (PF00560) 162->185	gi|46396756|sp|P93194.2|RPK1_IPONI Receptor-like protein kinase; Flags: Precursor (1e-16)
Phybl70934	Phycomyces blakesleeanus	Leucine Rich Repeat (PF00560) 200->222, Leucine Rich Repeat (PF00560) 272->294, Leucine Rich Repeat (PF00560) 321->343, Leucine Rich Repeat (PF00560) 345->367, Leucine Rich Repeat (PF00560) 369->391	gi|51338834|sp|Q9SYQ8.3|CLV1_ARATH Receptor protein kinase CLAVATA1; Flags: Precursor (2e-32)
Phybl78885	Phycomyces blakesleeanus	Leucine rich repeat N-terminal domain (PF08263) 87->129, Leucine Rich Repeat (PF00560) 253->275, Leucine Rich Repeat (PF00560) 325->347, Leucine Rich Repeat (PF00560) 349->371	gi|30913045|sp|Q9LYN8.1|EXS_ARATH Leucine-rich repeat receptor protein kinase EXS; AltName: Extra sporogenous cells protein; AltName: Protein EXCESS MICROSPOROCYTES 1; Flags: Precursor (1e-33)
Popl103993	Postia placenta	Leucine Rich Repeat (PF07723) 172->197	None
Popl104162	Postia placenta	Leucine Rich Repeat (PF07723) 252->277	None
Popl99942	Postia placenta	Leucine Rich Repeat (PF07723) 544->569	None
PTRG_06785	Pyrenophora tritici-repentis	Leucine Rich Repeat (PF00560) 130->153, Leucine Rich Repeat (PF00560) 226->248, Leucine Rich Repeat (PF00560) 250->272	gi|75331365|sp|Q8W3M4.1|Y4744_ARATH Uncharacterized protein At4g06744; Flags: Precursor (1e-48)
RO3G_08725	Rhizopus oryzae	Leucine Rich Repeat (PF00560) 180->202	gi|29427920|sp|Q94F62.2|BAK1_ARATH BRASSINOSTEROID INSENSITIVE 1-associated receptor kinase 1; Short=BRI1-associated receptor kinase 1; AltName: Somatic embryogenesis receptor-like kinase 3; Flags: Precursor (3e-19)
RO3G_11619	Rhizopus oryzae	Leucine Rich Repeat (PF00560) 198->220, Leucine Rich Repeat (PF00560) 222->244, Leucine Rich Repeat (PF00560) 246->268, Leucine Rich Repeat (PF00560) 294->316, Leucine Rich Repeat (PF00560) 342->364, Leucine Rich Repeat (PF00560) 366->388	gi|46396756|sp|P93194.2|RPK1_IPONI Receptor-like protein kinase; Flags: Precursor (5e-39)
SNU01467	Stagonospora nodorum	Leucine Rich Repeat (PF00560) 489->510, Leucine Rich Repeat (PF00560) 512->533, Leucine Rich Repeat (PF00560) 535->556
SNU08573	Stagonospora nodorum	F-box domain (PF00646) 1->47, Leucine Rich Repeat (PF07723) 264->288	None
