# Supplementary material for: Comparative Genome Analysis Reveals an Absence of Leucine-Rich Repeat Pattern-Recognition Receptor Proteins in the Kingdom Fungi
Source: PLoS One. 2010 Sep 14;5(9):e12725. doi: 10.1371/journal.pone.0012725 (PMC2939053; doi:10.1371/journal.pone.0012725)
Supplement: Table S6 — The number of Toll-like receptors identified in each species (0.02 MB XLS) [file pone.0012725.s009.xls]

## Sheet: count_LRR_receptor_TIR
Table S6 - The number of Toll-like receptors identified in each species
Species	Phylogenetic group	Number of proteins
Cryptosporidium parvum	alveolate	0
Paramecium tetraurelia	alveolate	0
Plasmodium yoelii	alveolate	0
Tetrahymena thermophila	alveolate	0
Toxoplasma gondii	alveolate	0
Dictyostelium discoideum	amoebozoa	0
Dictyostelium purpureum	amoebozoa	0
Entamoeba histolytica	amoebozoa	0
Chlamydomonas reinhardtii	chlorophyte	0
Chlorella NC64A	chlorophyte	0
Micromonas pusilla	chlorophyte	0
Micromonas strain RCC299	chlorophyte	0
Ostreococcus lucimarinus	chlorophyte	0
Ostreococcus RCC809	chlorophyte	0
Ostreococcus tauri	chlorophyte	0
Volvox carteri	chlorophyte	0
Giardia lamblia	excavate	0
Leishmania major	excavate	0
Naegleria gruberi	excavate	0
Trichomonas vaginalis	excavate	0
Trypanosoma brucei	excavate	0
Trypanosoma cruzi	excavate	0
Aspergillus clavatus	fungi	0
Aspergillus flavus	fungi	0
Aspergillus fumigatus	fungi	0
Aspergillus nidulans	fungi	0
Aspergillus niger	fungi	0
Aspergillus oryzae	fungi	0
Aspergillus terreus	fungi	0
Batrachochytrium dendrobatidis	fungi	0
Botrytis cinerea	fungi	0
Candida albicans SC5314	fungi	0
Chaetomium globosum	fungi	0
Coccidioides immitis	fungi	0
Coccidioides posadasii	fungi	0
Cochliobolus heterostrophus	fungi	0
Coprinus cinereus	fungi	0
Cryptococcus neoformans	fungi	0
Encephalitozoon cuniculi	fungi	0
Fusarium graminearum	fungi	0
Fusarium oxysporum	fungi	0
Fusarium verticillioides	fungi	0
Histoplasma capsulatum	fungi	0
Laccaria bicolor	fungi	0
Magnaporthe grisea	fungi	0
Mucor circinelloides	fungi	0
Mycosphaerella fijiensis	fungi	0
Mycosphaerella graminicola	fungi	0
Nectria haematococca	fungi	0
Neosartorya fischeri	fungi	0
Neurospora crassa	fungi	0
Paracoccidioides brasiliensis	fungi	0
Phanerochaete chrysosporium	fungi	0
Phycomyces blakesleeanus	fungi	0
Pichia stipitis	fungi	0
Podospora anserina	fungi	0
Postia placenta	fungi	0
Puccinia graminis	fungi	0
Pyrenophora tritici-repentis	fungi	0
Rhizopus oryzae	fungi	0
Saccharomyces cerevisiae	fungi	0
Schizosaccharomyces pombe	fungi	0
Sclerotinia sclerotiorum	fungi	0
Sporobolomyces roseus	fungi	0
Stagonospora nodorum	fungi	0
Trichoderma atoviride	fungi	0
Trichoderma reesei	fungi	0
Trichoderma virens	fungi	0
Uncinocarpus reesii	fungi	0
Ustilago maydis	fungi	0
Yarrowia lipolytica	fungi	0
Emiliania huxleyi	haptophyte	0
Caenorhabditis elegans	metazoa	1
Capitella sp. I	metazoa	3
Ciona intestinalis	metazoa	0
Daphnia pulex	metazoa	5
Drosophila melanogaster	metazoa	10
Gallus gallus	metazoa	9
Helobdella robusta	metazoa	3
Homo sapiens	metazoa	13
Lottia gigantea	metazoa	6
Monosiga brevicollis	metazoa	0
Mus musculus	metazoa	9
Nematostella vectensis	metazoa	0
Takifugu rubripes	metazoa	6
Trichoplax adhaerens	metazoa	0
Xenopus tropicalis	metazoa	16
Hyaloperonospora parasitica	oomycete	0
Phytophthora infestans	oomycete	0
Phytophthora ramorum	oomycete	0
Phytophthora sojae	oomycete	0
Arabidopsis thaliana	plant	6
Oryza sativa	plant	0
Physcomitrella patens	plant	0
Populus trichocarpa	plant	1
Selaginella moellendorffii	plant	0
Sorghum bicolor	plant	0
Cyanidioschyzon merolae	rhodophyte	0
Aureococcus anophagefferens	stramenopile	0
Phaeodactylum tricornutum	stramenopile	0
Thalassiosira pseudonana	stramenopile	0
