# Supplementary material for: Comparative Genome Analysis Reveals an Absence of Leucine-Rich Repeat Pattern-Recognition Receptor Proteins in the Kingdom Fungi
Source: PLoS One. 2010 Sep 14;5(9):e12725. doi: 10.1371/journal.pone.0012725 (PMC2939053; doi:10.1371/journal.pone.0012725)
Supplement: Table S7 — The number of LRR-receptor kinases identified in each species (0.02 MB XLS) [file pone.0012725.s010.xls]

## Sheet: count_LRR_receptor_kinase
Table S7 - The number of LRR-receptor kinases identified in each species
Species	Phylogenetic group	Number of proteins
Cryptosporidium parvum	alveolate	0
Paramecium tetraurelia	alveolate	0
Plasmodium yoelii	alveolate	0
Tetrahymena thermophila	alveolate	0
Toxoplasma gondii	alveolate	0
Dictyostelium discoideum	amoebozoa	0
Dictyostelium purpureum	amoebozoa	0
Entamoeba histolytica	amoebozoa	1
Chlamydomonas reinhardtii	chlorophyte	0
Chlorella NC64A	chlorophyte	2
Micromonas pusilla	chlorophyte	0
Micromonas strain RCC299	chlorophyte	0
Ostreococcus lucimarinus	chlorophyte	0
Ostreococcus RCC809	chlorophyte	0
Ostreococcus tauri	chlorophyte	0
Volvox carteri	chlorophyte	0
Giardia lamblia	excavate	0
Leishmania major	excavate	0
Naegleria gruberi	excavate	0
Trichomonas vaginalis	excavate	0
Trypanosoma brucei	excavate	0
Trypanosoma cruzi	excavate	0
Aspergillus clavatus	fungi	0
Aspergillus flavus	fungi	0
Aspergillus fumigatus	fungi	0
Aspergillus nidulans	fungi	0
Aspergillus niger	fungi	0
Aspergillus oryzae	fungi	0
Aspergillus terreus	fungi	0
Batrachochytrium dendrobatidis	fungi	0
Botrytis cinerea	fungi	0
Candida albicans SC5314	fungi	0
Chaetomium globosum	fungi	0
Coccidioides immitis	fungi	0
Coccidioides posadasii	fungi	0
Cochliobolus heterostrophus	fungi	0
Coprinus cinereus	fungi	0
Cryptococcus neoformans	fungi	0
Encephalitozoon cuniculi	fungi	0
Fusarium graminearum	fungi	0
Fusarium oxysporum	fungi	0
Fusarium verticillioides	fungi	0
Histoplasma capsulatum	fungi	0
Laccaria bicolor	fungi	0
Magnaporthe grisea	fungi	0
Mucor circinelloides	fungi	0
Mycosphaerella fijiensis	fungi	0
Mycosphaerella graminicola	fungi	0
Nectria haematococca	fungi	0
Neosartorya fischeri	fungi	0
Neurospora crassa	fungi	0
Paracoccidioides brasiliensis	fungi	0
Phanerochaete chrysosporium	fungi	0
Phycomyces blakesleeanus	fungi	0
Pichia stipitis	fungi	0
Podospora anserina	fungi	0
Postia placenta	fungi	0
Puccinia graminis	fungi	0
Pyrenophora tritici-repentis	fungi	0
Rhizopus oryzae	fungi	0
Saccharomyces cerevisiae	fungi	0
Schizosaccharomyces pombe	fungi	0
Sclerotinia sclerotiorum	fungi	0
Sporobolomyces roseus	fungi	0
Stagonospora nodorum	fungi	0
Trichoderma atoviride	fungi	0
Trichoderma reesei	fungi	0
Trichoderma virens	fungi	0
Uncinocarpus reesii	fungi	0
Ustilago maydis	fungi	0
Yarrowia lipolytica	fungi	0
Emiliania huxleyi	haptophyte	0
Caenorhabditis elegans	metazoa	0
Capitella sp. I	metazoa	0
Ciona intestinalis	metazoa	0
Daphnia pulex	metazoa	0
Drosophila melanogaster	metazoa	0
Gallus gallus	metazoa	2
Helobdella robusta	metazoa	0
Homo sapiens	metazoa	2
Lottia gigantea	metazoa	0
Monosiga brevicollis	metazoa	8
Mus musculus	metazoa	1
Nematostella vectensis	metazoa	0
Takifugu rubripes	metazoa	1
Trichoplax adhaerens	metazoa	0
Xenopus tropicalis	metazoa	1
Hyaloperonospora parasitica	oomycete	1
Phytophthora infestans	oomycete	9
Phytophthora ramorum	oomycete	6
Phytophthora sojae	oomycete	10
Arabidopsis thaliana	plant	216
Oryza sativa	plant	177
Physcomitrella patens	plant	93
Populus trichocarpa	plant	301
Selaginella moellendorffii	plant	70
Sorghum bicolor	plant	208
Cyanidioschyzon merolae	rhodophyte	0
Aureococcus anophagefferens	stramenopile	0
Phaeodactylum tricornutum	stramenopile	0
Thalassiosira pseudonana	stramenopile	0
