# Supplementary material for: Comparative Genome Analysis Reveals an Absence of Leucine-Rich Repeat Pattern-Recognition Receptor Proteins in the Kingdom Fungi
Source: PLoS One. 2010 Sep 14;5(9):e12725. doi: 10.1371/journal.pone.0012725 (PMC2939053; doi:10.1371/journal.pone.0012725)
Supplement: Table S8 — LRR kinase proteins in fungi (0.02 MB XLS) [file pone.0012725.s011.xls]

## Sheet: LRR_kinase_fungi
Table S8 - LRR kinase proteins in fungi
protein ID	Species	Protein domains (Pfam)
BDEG00798	Batrachochytrium dendrobatidis	Protein tyrosine kinase (PF07714) 302->498, Leucine Rich Repeat (PF00560) 856->878, Leucine Rich Repeat (PF00560) 880->902
BDEG05169	Batrachochytrium dendrobatidis	Protein tyrosine kinase (PF07714) 190->458, Leucine Rich Repeat (PF00560) 694->716, Leucine Rich Repeat (PF00560) 718->740, Leucine Rich Repeat (PF00560) 742->763, Leucine Rich Repeat (PF00560) 809->831
BDEG05217	Batrachochytrium dendrobatidis	Protein tyrosine kinase (PF07714) 708->907, Leucine Rich Repeat (PF00560) 1239->1261, Leucine Rich Repeat (PF00560) 1290->1312
BDEG06902	Batrachochytrium dendrobatidis	Protein tyrosine kinase (PF07714) 218->470, Leucine Rich Repeat (PF00560) 810->832, Leucine Rich Repeat (PF00560) 834->856, Leucine Rich Repeat (PF00560) 858->880, Leucine Rich Repeat (PF00560) 882->904, Leucine Rich Repeat (PF00560) 906->928
BC1G_01380	Botrytis cinerea	Leucine Rich Repeat (PF00560) 37->58, Leucine Rich Repeat (PF00560) 105->126, Protein tyrosine kinase (PF07714) 203->441
MGG_04725	Magnaporthe grisea	Leucine Rich Repeat (PF00560) 37->59, Leucine Rich Repeat (PF00560) 61->82, Leucine Rich Repeat (PF00560) 106->127, Leucine Rich Repeat (PF00560) 152->173, Protein tyrosine kinase (PF07714) 211->450
NCU05808	Neurospora crassa	Leucine Rich Repeat (PF00560) 38->59, Leucine Rich Repeat (PF00560) 62->83, Leucine Rich Repeat (PF00560) 108->129, Leucine Rich Repeat (PF00560) 156->177, Protein tyrosine kinase (PF07714) 216->496
Pa_4_680	Podospora anserina	Leucine Rich Repeat (PF00560) 45->66, Leucine Rich Repeat (PF00560) 69->89, Leucine Rich Repeat (PF00560) 113->134, Leucine Rich Repeat (PF00560) 159->181, Protein tyrosine kinase (PF07714) 216->454
SS1G_06131	Sclerotinia sclerotiorum	Leucine Rich Repeat (PF00560) 37->58, Leucine Rich Repeat (PF00560) 105->126, Protein tyrosine kinase (PF07714) 203->441
