# Supplementary material for: Comparative Genome Analysis Reveals an Absence of Leucine-Rich Repeat Pattern-Recognition Receptor Proteins in the Kingdom Fungi
Source: PLoS One. 2010 Sep 14;5(9):e12725. doi: 10.1371/journal.pone.0012725 (PMC2939053; doi:10.1371/journal.pone.0012725)
Supplement: Table S9 — Protein domain structure of fungal LRR-domain containing adenylate cyclases (0.04 MB XLS) [file pone.0012725.s012.xls]

## Sheet: adenylate_cyclase_LRR_info
Table S9 - Protein domain structure of fungal LRR-domain containing adenylate cyclases
protein_ID	species	Protein domains (Pfam)
ACLA083900	Aspergillus clavatus	Adenylate cyclase G-alpha binding domain (PF08509) 521->576, Ras association (RalGDS/AF-6) domain (PF00788) 625->703, Leucine Rich Repeat (PF00560) 816->838, Leucine Rich Repeat (PF00560) 863->884, Leucine Rich Repeat (PF00560) 886->906, Leucine Rich Repeat (PF00560) 1066->1087, Leucine Rich Repeat (PF00560) 1261->1280, Leucine Rich Repeat (PF00560) 1285->1306, Protein phosphatase 2C (PF00481) 14…
AFL09157	Aspergillus flavus	Adenylate cyclase G-alpha binding domain (PF08509) 519->568, Ras association (RalGDS/AF-6) domain (PF00788) 617->685, Leucine Rich Repeat (PF00560) 809->831, Leucine Rich Repeat (PF00560) 833->854, Leucine Rich Repeat (PF00560) 856->877, Leucine Rich Repeat (PF00560) 1059->1080, Leucine Rich Repeat (PF00560) 1203->1225, Leucine Rich Repeat (PF00560) 1227->1249, Leucine Rich Repeat (PF00560) 1251-…
Afu6g08520	Aspergillus fumigatus	Adenylate cyclase G-alpha binding domain (PF08509) 416->471, Ras association (RalGDS/AF-6) domain (PF00788) 520->598, Leucine Rich Repeat (PF00560) 711->733, Leucine Rich Repeat (PF00560) 758->779, Leucine Rich Repeat (PF00560) 781->801, Leucine Rich Repeat (PF00560) 961->982, Leucine Rich Repeat (PF00560) 1135->1157, Leucine Rich Repeat (PF00560) 1159->1178, Leucine Rich Repeat (PF00560) 1183->1…
AN3913	Aspergillus nidulans	Adenylate cyclase G-alpha binding domain (PF08509) 507->558, Ras association (RalGDS/AF-6) domain (PF00788) 607->685, Leucine Rich Repeat (PF00560) 798->820, Leucine Rich Repeat (PF00560) 822->843, Leucine Rich Repeat (PF00560) 845->866, Leucine Rich Repeat (PF00560) 868->888, Leucine Rich Repeat (PF00560) 1048->1070, Leucine Rich Repeat (PF00560) 1243->1262, Protein phosphatase 2C (PF00481) 1410…
Asni178015	Aspergillus niger	Adenylate cyclase G-alpha binding domain (PF08509) 512->564, Ras association (RalGDS/AF-6) domain (PF00788) 612->690, Leucine Rich Repeat (PF00560) 803->825, Leucine Rich Repeat (PF00560) 850->871, Leucine Rich Repeat (PF00560) 873->893, Leucine Rich Repeat (PF00560) 1053->1075, Leucine Rich Repeat (PF00560) 1223->1245, Leucine Rich Repeat (PF00560) 1247->1266, Protein phosphatase 2C (PF00481) 14…
A001000512	Aspergillus oryzae	Adenylate cyclase G-alpha binding domain (PF08509) 477->526, Ras association (RalGDS/AF-6) domain (PF00788) 575->643, Leucine Rich Repeat (PF00560) 767->789, Leucine Rich Repeat (PF00560) 791->812, Leucine Rich Repeat (PF00560) 814->835, Leucine Rich Repeat (PF00560) 1017->1038, Leucine Rich Repeat (PF00560) 1161->1183, Leucine Rich Repeat (PF00560) 1185->1207, Leucine Rich Repeat (PF00560) 1209-…
ATEG_05799	Aspergillus terreus	Adenylate cyclase G-alpha binding domain (PF08509) 521->575, Ras association (RalGDS/AF-6) domain (PF00788) 617->695, Leucine Rich Repeat (PF00560) 808->830, Leucine Rich Repeat (PF00560) 855->876, Leucine Rich Repeat (PF00560) 878->898, Leucine Rich Repeat (PF00560) 1058->1080, Leucine Rich Repeat (PF00560) 1227->1249, Leucine Rich Repeat (PF00560) 1251->1270, Protein phosphatase 2C (PF00481) 14…
BC1G_02865	Botrytis cinerea	Adenylate cyclase G-alpha binding domain (PF08509) 496->546, Ras association (RalGDS/AF-6) domain (PF00788) 594->683, Leucine Rich Repeat (PF00560) 786->808, Leucine Rich Repeat (PF00560) 967->989, Leucine Rich Repeat (PF00560) 1014->1035, Leucine Rich Repeat (PF00560) 1231->1252, Protein phosphatase 2C (PF00481) 1321->1574, Adenylate and Guanylate cyclase catalytic domain (PF00211) 1634->1695
C19_5148	Candida albicans	Adenylate cyclase G-alpha binding domain (PF08509) 182->237, Ras association (RalGDS/AF-6) domain (PF00788) 304->381, Leucine Rich Repeat (PF00560) 514->535, Leucine Rich Repeat (PF00560) 560->581, Leucine Rich Repeat (PF00560) 583->605, Leucine Rich Repeat (PF00560) 695->716, Leucine Rich Repeat (PF00560) 741->762, Leucine Rich Repeat (PF00560) 833->855, Leucine Rich Repeat (PF00560) 857->879, L…
CHG01828	Chaetomium globosum	Adenylate cyclase G-alpha binding domain (PF08509) 330->382, Ras association (RalGDS/AF-6) domain (PF00788) 427->516, Leucine Rich Repeat (PF00560) 618->640, Leucine Rich Repeat (PF00560) 688->709, Leucine Rich Repeat (PF00560) 711->733, Leucine Rich Repeat (PF00560) 822->843, Leucine Rich Repeat (PF00560) 1075->1097, Protein phosphatase 2C (PF00481) 1240->1493, Adenylate and Guanylate cyclase ca…
CIMG_01098	Coccidioides immitis	Adenylate cyclase G-alpha binding domain (PF08509) 442->497, Ras association (RalGDS/AF-6) domain (PF00788) 547->636, Leucine Rich Repeat (PF00560) 738->760, Leucine Rich Repeat (PF00560) 762->783, Leucine Rich Repeat (PF00560) 785->806, Leucine Rich Repeat (PF00560) 988->1010, Leucine Rich Repeat (PF00560) 1155->1177, Leucine Rich Repeat (PF00560) 1179->1201, Protein phosphatase 2C (PF00481) 134…
CPSG02889	Coccidioides posadasii	Adenylate cyclase G-alpha binding domain (PF08509) 487->542, Ras association (RalGDS/AF-6) domain (PF00788) 592->681, Leucine Rich Repeat (PF00560) 783->805, Leucine Rich Repeat (PF00560) 807->828, Leucine Rich Repeat (PF00560) 830->851, Leucine Rich Repeat (PF00560) 1033->1055, Leucine Rich Repeat (PF00560) 1200->1222
Cohe29699	Cochliobolus heterostrophus	Adenylate cyclase G-alpha binding domain (PF08509) 395->431, Ras association (RalGDS/AF-6) domain (PF00788) 493->582, Leucine Rich Repeat (PF00560) 684->706, Leucine Rich Repeat (PF00560) 754->774, Leucine Rich Repeat (PF00560) 776->798, Leucine Rich Repeat (PF00560) 911->932, Leucine Rich Repeat (PF00560) 1133->1155, Leucine Rich Repeat (PF00560) 1157->1178, Protein phosphatase 2C (PF00481) 1302…
CC1G_02340	Coprinus cinereus	Ras association (RalGDS/AF-6) domain (PF00788) 1->74, Leucine Rich Repeat (PF00560) 205->226, Leucine Rich Repeat (PF00560) 251->272, Leucine Rich Repeat (PF00560) 367->389, Leucine Rich Repeat (PF00560) 391->412, Leucine Rich Repeat (PF00560) 437->458, Leucine Rich Repeat (PF00560) 538->560, Leucine Rich Repeat (PF00560) 562->584, Leucine Rich Repeat (PF00560) 586->607, Protein phosphatase 2C (P…
CNAG_03202	Cryptococcus neoformans	Adenylate cyclase G-alpha binding domain (PF08509) 474->524, Leucine Rich Repeat (PF00560) 1075->1096, Leucine Rich Repeat (PF00560) 1144->1164, Leucine Rich Repeat (PF00560) 1215->1237, Leucine Rich Repeat (PF00560) 1239->1260, Leucine Rich Repeat (PF00560) 1285->1306, Leucine Rich Repeat (PF00560) 1406->1428, Leucine Rich Repeat (PF00560) 1430->1451, Protein phosphatase 2C (PF00481) 1687->1835,…
FGSG_01234	Fusarium graminearum	Adenylate cyclase G-alpha binding domain (PF08509) 632->683, Ras association (RalGDS/AF-6) domain (PF00788) 731->809, Leucine Rich Repeat (PF00560) 922->944, Leucine Rich Repeat (PF00560) 969->990, Leucine Rich Repeat (PF00560) 1015->1037, Leucine Rich Repeat (PF00560) 1039->1059, Leucine Rich Repeat (PF00560) 1103->1124, Leucine Rich Repeat (PF00560) 1375->1397, Protein phosphatase 2C (PF00481) …
FOXG_00154	Fusarium oxysporum	Leucine Rich Repeat (PF00560) 144->166, Leucine Rich Repeat (PF00560) 191->212, Leucine Rich Repeat (PF00560) 214->235, Leucine Rich Repeat (PF00560) 237->259, Leucine Rich Repeat (PF00560) 261->281, Leucine Rich Repeat (PF00560) 325->346, Leucine Rich Repeat (PF00560) 348->369, Leucine Rich Repeat (PF00560) 572->595, Leucine Rich Repeat (PF00560) 597->619, Protein phosphatase 2C (PF00481) 765->1…
FVEG01363	Fusarium verticillioides	Adenylate cyclase G-alpha binding domain (PF08509) 632->683, Ras association (RalGDS/AF-6) domain (PF00788) 730->808, Leucine Rich Repeat (PF00560) 921->943, Leucine Rich Repeat (PF00560) 968->989, Leucine Rich Repeat (PF00560) 991->1012, Leucine Rich Repeat (PF00560) 1014->1036, Leucine Rich Repeat (PF00560) 1038->1058, Leucine Rich Repeat (PF00560) 1102->1123, Leucine Rich Repeat (PF00560) 1125…
HCAG_03754	Histoplasma capsulatum	Leucine Rich Repeat (PF00560) 85->106, Leucine Rich Repeat (PF00560) 108->129, Leucine Rich Repeat (PF00560) 258->280, Leucine Rich Repeat (PF00560) 282->304, Leucine Rich Repeat (PF00560) 306->328, Protein phosphatase 2C (PF00481) 474->729, Adenylate and Guanylate cyclase catalytic domain (PF00211) 788->849
Labi172637	Laccaria bicolor	Leucine Rich Repeat (PF00560) 87->109, Leucine Rich Repeat (PF00560) 111->132, Leucine Rich Repeat (PF00560) 134->155, Leucine Rich Repeat (PF00560) 157->178, Leucine Rich Repeat (PF00560) 297->318, Leucine Rich Repeat (PF00560) 343->364, Leucine Rich Repeat (PF00560) 458->480, Leucine Rich Repeat (PF00560) 482->504, Protein phosphatase 2C (PF00481) 724->926, Adenylate and Guanylate cyclase catal…
MGG_09898	Magnaporthe grisea	Adenylate cyclase G-alpha binding domain (PF08509) 537->592, Ras association (RalGDS/AF-6) domain (PF00788) 638->726, Leucine Rich Repeat (PF00560) 828->850, Leucine Rich Repeat (PF00560) 898->919, Leucine Rich Repeat (PF00560) 921->943, Leucine Rich Repeat (PF00560) 1032->1053, Leucine Rich Repeat (PF00560) 1260->1282, Leucine Rich Repeat (PF00560) 1284->1306, Protein phosphatase 2C (PF00481) 14…
Muci40760	Mucor circinelloides	Ras association (RalGDS/AF-6) domain (PF00788) 25->108, Leucine Rich Repeat (PF00560) 202->224, Leucine Rich Repeat (PF00560) 273->294, Leucine Rich Repeat (PF00560) 320->340, Leucine Rich Repeat (PF00560) 387->409, Leucine Rich Repeat (PF00560) 411->432, Leucine Rich Repeat (PF00560) 434->455, Leucine Rich Repeat (PF00560) 635->657, Protein phosphatase 2C (PF00481) 879->1030, Adenylate and Guany…
Muci75875	Mucor circinelloides	Ras association (RalGDS/AF-6) domain (PF00788) 59->136, Leucine Rich Repeat (PF00560) 243->265, Leucine Rich Repeat (PF00560) 267->288, Leucine Rich Repeat (PF00560) 313->334, Leucine Rich Repeat (PF00560) 360->380, Leucine Rich Repeat (PF00560) 460->481, Leucine Rich Repeat (PF00560) 483->504, Leucine Rich Repeat (PF00560) 691->713, Protein phosphatase 2C (PF00481) 915->1085, Adenylate and Guany…
Myfi88095	Mycosphaerella fijiensis	Ras association (RalGDS/AF-6) domain (PF00788) 636->714, Leucine Rich Repeat (PF00560) 827->849, Leucine Rich Repeat (PF00560) 874->895, Leucine Rich Repeat (PF00560) 1054->1075, Leucine Rich Repeat (PF00560) 1272->1291, Leucine Rich Repeat (PF00560) 1296->1317, Protein phosphatase 2C (PF00481) 1438->1693, Adenylate and Guanylate cyclase catalytic domain (PF00211) 1752->1909
Mycgr74765	Mycosphaerella graminicola	Ras association (RalGDS/AF-6) domain (PF00788) 78->167, Leucine Rich Repeat (PF00560) 269->291, Leucine Rich Repeat (PF00560) 316->337, Leucine Rich Repeat (PF00560) 361->383, Leucine Rich Repeat (PF00560) 407->428, Leucine Rich Repeat (PF00560) 496->517, Leucine Rich Repeat (PF00560) 718->737, Leucine Rich Repeat (PF00560) 742->763, Protein phosphatase 2C (PF00481) 884->1139, Adenylate and Guany…
Neha30776	Nectria haematococca	Adenylate cyclase G-alpha binding domain (PF08509) 117->168, Ras association (RalGDS/AF-6) domain (PF00788) 215->293, Leucine Rich Repeat (PF00560) 476->497, Leucine Rich Repeat (PF00560) 499->521, Leucine Rich Repeat (PF00560) 523->543, Leucine Rich Repeat (PF00560) 587->608, Leucine Rich Repeat (PF00560) 610->631, Leucine Rich Repeat (PF00560) 856->878, Protein phosphatase 2C (PF00481) 1024->12…
NFIA054170	Neosartorya fischeri	Adenylate cyclase G-alpha binding domain (PF08509) 520->575, Ras association (RalGDS/AF-6) domain (PF00788) 624->702, Leucine Rich Repeat (PF00560) 815->837, Leucine Rich Repeat (PF00560) 862->883, Leucine Rich Repeat (PF00560) 885->905, Leucine Rich Repeat (PF00560) 1065->1086, Leucine Rich Repeat (PF00560) 1239->1261, Leucine Rich Repeat (PF00560) 1263->1282, Leucine Rich Repeat (PF00560) 1287-…
NCU08377	Neurospora crassa	Adenylate cyclase G-alpha binding domain (PF08509) 650->702, Ras association (RalGDS/AF-6) domain (PF00788) 749->828, Leucine Rich Repeat (PF00560) 940->962, Leucine Rich Repeat (PF00560) 1057->1077, Leucine Rich Repeat (PF00560) 1121->1142, Leucine Rich Repeat (PF00560) 1144->1165, Leucine Rich Repeat (PF00560) 1167->1188, Leucine Rich Repeat (PF00560) 1375->1397, Leucine Rich Repeat (PF00560) 1…
PABG02017	Paracoccidioides brasiliensis	Adenylate cyclase G-alpha binding domain (PF08509) 454->503, Ras association (RalGDS/AF-6) domain (PF00788) 555->644, Leucine Rich Repeat (PF00560) 746->768, Leucine Rich Repeat (PF00560) 770->791, Leucine Rich Repeat (PF00560) 862->882, Leucine Rich Repeat (PF00560) 973->994, Leucine Rich Repeat (PF00560) 1168->1190, Leucine Rich Repeat (PF00560) 1192->1214, Leucine Rich Repeat (PF00560) 1216->1…
Phch125376	Phanerochaete chrysosporium	Ras association (RalGDS/AF-6) domain (PF00788) 47->125, Leucine Rich Repeat (PF00560) 236->258, Leucine Rich Repeat (PF00560) 260->281, Leucine Rich Repeat (PF00560) 283->304, Leucine Rich Repeat (PF00560) 306->327, Leucine Rich Repeat (PF00560) 446->467, Leucine Rich Repeat (PF00560) 492->513, Leucine Rich Repeat (PF00560) 601->623, Leucine Rich Repeat (PF00560) 625->647, Leucine Rich Repeat (PF…
Phybl10036	Phycomyces blakesleeanus	Ras association (RalGDS/AF-6) domain (PF00788) 1->86, Leucine Rich Repeat (PF00560) 182->204, Leucine Rich Repeat (PF00560) 252->273, Leucine Rich Repeat (PF00560) 365->387, Leucine Rich Repeat (PF00560) 588->610, Leucine Rich Repeat (PF00560) 611->633, Leucine Rich Repeat (PF00560) 635->656, Protein phosphatase 2C (PF00481) 812->1004, Adenylate and Guanylate cyclase catalytic domain (PF00211) 10…
Phybl31190	Phycomyces blakesleeanus	Leucine Rich Repeat (PF00560) 148->170, Leucine Rich Repeat (PF00560) 172->193, Leucine Rich Repeat (PF00560) 218->239, Leucine Rich Repeat (PF00560) 265->285, Leucine Rich Repeat (PF00560) 345->367, Leucine Rich Repeat (PF00560) 369->390, Leucine Rich Repeat (PF00560) 415->437, Leucine Rich Repeat (PF00560) 618->640, Protein phosphatase 2C (PF00481) 842->1012, Adenylate and Guanylate cyclase cat…
Pist67440	Pichia stipitis	Adenylate cyclase G-alpha binding domain (PF08509) 190->221, Ras association (RalGDS/AF-6) domain (PF00788) 349->426, Leucine Rich Repeat (PF00560) 536->557, Leucine Rich Repeat (PF00560) 559->580, Leucine Rich Repeat (PF00560) 582->603, Leucine Rich Repeat (PF00560) 605->626, Leucine Rich Repeat (PF00560) 628->650, Leucine Rich Repeat (PF00560) 786->807, Leucine Rich Repeat (PF00560) 863->885, L…
Pa_1_3040	Podospora anserina	Adenylate cyclase G-alpha binding domain (PF08509) 541->592, Ras association (RalGDS/AF-6) domain (PF00788) 638->726, Leucine Rich Repeat (PF00560) 827->849, Leucine Rich Repeat (PF00560) 851->872, Leucine Rich Repeat (PF00560) 897->918, Leucine Rich Repeat (PF00560) 920->942, Leucine Rich Repeat (PF00560) 1031->1052, Leucine Rich Repeat (PF00560) 1054->1075, Leucine Rich Repeat (PF00560) 1260->1…
Popl19012	Postia placenta	Ras association (RalGDS/AF-6) domain (PF00788) 1->75, Leucine Rich Repeat (PF00560) 252->273, Leucine Rich Repeat (PF00560) 391->412, Leucine Rich Repeat (PF00560) 515->537, Leucine Rich Repeat (PF00560) 539->561, Leucine Rich Repeat (PF00560) 563->585, Leucine Rich Repeat (PF00560) 587->608, Protein phosphatase 2C (PF00481) 832->980, Adenylate and Guanylate cyclase catalytic domain (PF00211) 103…
PGTG_18866	Puccinia graminis	Adenylate cyclase G-alpha binding domain (PF08509) 111->136, Ras association (RalGDS/AF-6) domain (PF00788) 554->632, Leucine Rich Repeat (PF00560) 740->762, Leucine Rich Repeat (PF00560) 810->831, Leucine Rich Repeat (PF00560) 967->988, Leucine Rich Repeat (PF00560) 990->1011, Leucine Rich Repeat (PF00560) 1103->1125, Leucine Rich Repeat (PF00560) 1127->1149, Leucine Rich Repeat (PF00560) 1151->…
PTRG_11660	Pyrenophora tritici-repentis	Adenylate cyclase G-alpha binding domain (PF08509) 505->545, Ras association (RalGDS/AF-6) domain (PF00788) 608->697, Leucine Rich Repeat (PF00560) 799->821, Leucine Rich Repeat (PF00560) 823->844, Leucine Rich Repeat (PF00560) 869->889, Leucine Rich Repeat (PF00560) 891->913, Leucine Rich Repeat (PF00560) 1026->1047, Leucine Rich Repeat (PF00560) 1246->1268, Leucine Rich Repeat (PF00560) 1270->1…
RO3G_02872	Rhizopus oryzae	Ras association (RalGDS/AF-6) domain (PF00788) 69->157, Leucine Rich Repeat (PF00560) 254->276, Leucine Rich Repeat (PF00560) 278->299, Leucine Rich Repeat (PF00560) 324->345, Leucine Rich Repeat (PF00560) 482->503, Leucine Rich Repeat (PF00560) 505->526, Leucine Rich Repeat (PF00560) 648->670, Leucine Rich Repeat (PF00560) 671->693, Protein phosphatase 2C (PF00481) 895->1065, Adenylate and Guany…
RO3G_06449	Rhizopus oryzae	Ras association (RalGDS/AF-6) domain (PF00788) 323->357, Leucine Rich Repeat (PF00560) 481->503, Leucine Rich Repeat (PF00560) 552->573, Leucine Rich Repeat (PF00560) 599->619, Leucine Rich Repeat (PF00560) 665->687, Leucine Rich Repeat (PF00560) 689->710, Leucine Rich Repeat (PF00560) 712->733, Leucine Rich Repeat (PF00560) 913->935, Protein phosphatase 2C (PF00481) 1137->1307, Adenylate and Gua…
RO3G_07463	Rhizopus oryzae	Leucine Rich Repeat (PF00560) 494->516, Leucine Rich Repeat (PF00560) 518->539, Leucine Rich Repeat (PF00560) 565->586, Leucine Rich Repeat (PF00560) 612->632, Leucine Rich Repeat (PF00560) 678->700, Leucine Rich Repeat (PF00560) 725->746, Leucine Rich Repeat (PF00560) 919->941, Protein phosphatase 2C (PF00481) 1046->1275, Adenylate and Guanylate cyclase catalytic domain (PF00211) 1338->1507
NP_012529.1	Saccharomyces cerevisiae	Adenylate cyclase G-alpha binding domain (PF08509) 367->420, Ras association (RalGDS/AF-6) domain (PF00788) 676->753, Leucine Rich Repeat (PF00560) 887->908, Leucine Rich Repeat (PF00560) 933->954, Leucine Rich Repeat (PF00560) 1065->1086, Leucine Rich Repeat (PF00560) 1088->1109, Leucine Rich Repeat (PF00560) 1111->1132, Leucine Rich Repeat (PF00560) 1211->1233, Protein phosphatase 2C (PF00481) …
NP_596159.1	Schizosaccharomyces pombe	Adenylate cyclase G-alpha binding domain (PF08509) 155->200, Ras association (RalGDS/AF-6) domain (PF00788) 292->372, Leucine Rich Repeat (PF00560) 503->524, Leucine Rich Repeat (PF00560) 526->547, Leucine Rich Repeat (PF00560) 549->570, Leucine Rich Repeat (PF00560) 596->616, Leucine Rich Repeat (PF00560) 831->853, Protein phosphatase 2C (PF00481) 1032->1268, Adenylate and Guanylate cyclase cata…
SS1G_07715	Sclerotinia sclerotiorum	Adenylate cyclase G-alpha binding domain (PF08509) 479->529, Ras association (RalGDS/AF-6) domain (PF00788) 575->664, Leucine Rich Repeat (PF00560) 766->788, Leucine Rich Repeat (PF00560) 947->969, Leucine Rich Repeat (PF00560) 994->1015, Leucine Rich Repeat (PF00560) 1193->1215, Leucine Rich Repeat (PF00560) 1217->1239, Leucine Rich Repeat (PF00560) 1293->1314, Protein phosphatase 2C (PF00481) 1…
Spro81	Sporobolomyces roseus	Ras association (RalGDS/AF-6) domain (PF00788) 36->113, Leucine Rich Repeat (PF00560) 221->243, Leucine Rich Repeat (PF00560) 268->289, Leucine Rich Repeat (PF00560) 401->423, Leucine Rich Repeat (PF00560) 425->446, Leucine Rich Repeat (PF00560) 585->607, Leucine Rich Repeat (PF00560) 609->631, Leucine Rich Repeat (PF00560) 633->654, Protein phosphatase 2C (PF00481) 764->1029, Adenylate and Guany…
SNU15890	Stagonospora nodorum	Adenylate cyclase G-alpha binding domain (PF08509) 511->547, Ras association (RalGDS/AF-6) domain (PF00788) 610->699, Leucine Rich Repeat (PF00560) 801->823, Leucine Rich Repeat (PF00560) 825->846, Leucine Rich Repeat (PF00560) 871->891, Leucine Rich Repeat (PF00560) 893->915, Leucine Rich Repeat (PF00560) 1254->1276, Leucine Rich Repeat (PF00560) 1278->1299, Protein phosphatase 2C (PF00481) 1423…
Trat151535	Trichoderma atoviride	Adenylate cyclase G-alpha binding domain (PF08509) 143->194, Ras association (RalGDS/AF-6) domain (PF00788) 240->318, Leucine Rich Repeat (PF00560) 431->453, Leucine Rich Repeat (PF00560) 478->499, Leucine Rich Repeat (PF00560) 501->522, Leucine Rich Repeat (PF00560) 524->546, Leucine Rich Repeat (PF00560) 548->568, Leucine Rich Repeat (PF00560) 635->656, Leucine Rich Repeat (PF00560) 889->911, P…
Trre49183	Trichoderma reesei	Adenylate cyclase G-alpha binding domain (PF08509) 1->28, Ras association (RalGDS/AF-6) domain (PF00788) 75->153, Leucine Rich Repeat (PF00560) 266->288, Leucine Rich Repeat (PF00560) 313->334, Leucine Rich Repeat (PF00560) 336->357, Leucine Rich Repeat (PF00560) 359->381, Leucine Rich Repeat (PF00560) 383->403, Leucine Rich Repeat (PF00560) 470->491, Leucine Rich Repeat (PF00560) 723->745, Prote…
Trvi35949	Trichoderma virens	Adenylate cyclase G-alpha binding domain (PF08509) 95->145, Ras association (RalGDS/AF-6) domain (PF00788) 193->271, Leucine Rich Repeat (PF00560) 384->406, Leucine Rich Repeat (PF00560) 454->475, Leucine Rich Repeat (PF00560) 477->499, Leucine Rich Repeat (PF00560) 501->521, Leucine Rich Repeat (PF00560) 588->609, Leucine Rich Repeat (PF00560) 842->864, Protein phosphatase 2C (PF00481) 1011->126…
UREG_01033	Uncinocarpus reesii	Adenylate cyclase G-alpha binding domain (PF08509) 488->543, Ras association (RalGDS/AF-6) domain (PF00788) 595->684, Leucine Rich Repeat (PF00560) 786->808, Leucine Rich Repeat (PF00560) 856->876, Leucine Rich Repeat (PF00560) 1036->1058, Leucine Rich Repeat (PF00560) 1181->1203, Leucine Rich Repeat (PF00560) 1205->1227, Leucine Rich Repeat (PF00560) 1229->1251, Protein phosphatase 2C (PF00481) …
UM05232	Ustilago maydis	Ras association (RalGDS/AF-6) domain (PF00788) 970->1047, Leucine Rich Repeat (PF00560) 1157->1179, Leucine Rich Repeat (PF00560) 1204->1225, Leucine Rich Repeat (PF00560) 1227->1248, Leucine Rich Repeat (PF00560) 1273->1293, Leucine Rich Repeat (PF00560) 1535->1557, Leucine Rich Repeat (PF00560) 1559->1581, Leucine Rich Repeat (PF00560) 1583->1604, Protein phosphatase 2C (PF00481) 1742->1993, Ad…
XP_501072.1	Yarrowia lipolytica	Ras association (RalGDS/AF-6) domain (PF00788) 580->668, Leucine Rich Repeat (PF00560) 814->835, Leucine Rich Repeat (PF00560) 837->858, Leucine Rich Repeat (PF00560) 860->881, Leucine Rich Repeat (PF00560) 947->969, Leucine Rich Repeat (PF00560) 971->992, Leucine Rich Repeat (PF00560) 1017->1038, Leucine Rich Repeat (PF00560) 1162->1184, Leucine Rich Repeat (PF00560) 1186->1208, Protein phosphat…
