# Supplementary material for: Comparative Genome Analysis Reveals an Absence of Leucine-Rich Repeat Pattern-Recognition Receptor Proteins in the Kingdom Fungi
Source: PLoS One. 2010 Sep 14;5(9):e12725. doi: 10.1371/journal.pone.0012725 (PMC2939053; doi:10.1371/journal.pone.0012725)
Supplement: Table S10 — Protein domain structure of fungal NACHT domain containing proteins (0.05 MB XLS) [file pone.0012725.s013.xls]

## Sheet: fungal_NachT_domain_info
Table S10 - Protein domain structure of fungal NACHT domain containing proteins
Key	Red - proteins showing HNWD family structure
	Blue - proteins with both NACHT domain and WD domain
protein ID	species	Protein domains (Pfam)
A005000041	Aspergillus oryzae	NACHT domain (PF05729) 314->499, WD domain, G-beta repeat (PF00400) 833->870, WD domain, G-beta repeat (PF00400) 881->907, WD domain, G-beta repeat (PF00400) 909->948, WD domain, G-beta repeat (PF00400) 952->990, WD domain, G-beta repeat (PF00400) 993->1031, WD domain, G-beta repeat (PF00400) 1051->1080, WD domain, G-beta repeat (PF00400) 1084->1122, WD domain, G-beta repeat (PF00400) 1126->1164,…
ATEG_04241	Aspergillus terreus	NACHT domain (PF05729) 454->618, HEAT repeat (PF02985) 1267->1303
ATEG_05017	Aspergillus terreus	Phosphorylase superfamily (PF01048) 28->324, NACHT domain (PF05729) 400->568
ATEG_09957	Aspergillus terreus	NACHT domain (PF05729) 478->661, WD domain, G-beta repeat (PF00400) 999->1037, WD domain, G-beta repeat (PF00400) 1045->1083, WD domain, G-beta repeat (PF00400) 1091->1129, WD domain, G-beta repeat (PF00400) 1134->1172, WD domain, G-beta repeat (PF00400) 1177->1215, WD domain, G-beta repeat (PF00400) 1223->1261, WD domain, G-beta repeat (PF00400) 1268->1306, WD domain, G-beta repeat (PF00400) 131…
Afu7g00550	Aspergillus fumigatus	NACHT domain (PF05729) 455->636, WD domain, G-beta repeat (PF00400) 978->1016, WD domain, G-beta repeat (PF00400) 1020->1058, WD domain, G-beta repeat (PF00400) 1062->1100, WD domain, G-beta repeat (PF00400) 1104->1141, WD domain, G-beta repeat (PF00400) 1145->1183, WD domain, G-beta repeat (PF00400) 1187->1225, WD domain, G-beta repeat (PF00400) 1287->1312, WD domain, G-beta repeat (PF00400) 131…
Afu7g07100	Aspergillus fumigatus	Phosphorylase superfamily (PF01048) 220->299, NACHT domain (PF05729) 370->565, WD domain, G-beta repeat (PF00400) 890->928, WD domain, G-beta repeat (PF00400) 932->970, WD domain, G-beta repeat (PF00400) 974->1012, WD domain, G-beta repeat (PF00400) 1016->1054, WD domain, G-beta repeat (PF00400) 1058->1096, WD domain, G-beta repeat (PF00400) 1100->1138, WD domain, G-beta repeat (PF00400) 1142->11…
Asni118837	Aspergillus niger	NACHT domain (PF05729) 321->442, WD domain, G-beta repeat (PF00400) 839->877, WD domain, G-beta repeat (PF00400) 880->918, WD domain, G-beta repeat (PF00400) 935->959, WD domain, G-beta repeat (PF00400) 1019->1048, WD domain, G-beta repeat (PF00400) 1133->1171, WD domain, G-beta repeat (PF00400) 1175->1213
Asni133413	Aspergillus niger	NACHT domain (PF05729) 85->248
BC1G_06982	Botrytis cinerea	Heterokaryon incompatibility protein (HET) (PF06985) 27->148, NACHT domain (PF05729) 298->494, WD domain, G-beta repeat (PF00400) 753->791, WD domain, G-beta repeat (PF00400) 796->834, WD domain, G-beta repeat (PF00400) 839->865
BC1G_07004	Botrytis cinerea	NACHT domain (PF05729) 220->402, WD domain, G-beta repeat (PF00400) 739->777, WD domain, G-beta repeat (PF00400) 781->819, WD domain, G-beta repeat (PF00400) 823->861, WD domain, G-beta repeat (PF00400) 865->903, WD domain, G-beta repeat (PF00400) 907->945, WD domain, G-beta repeat (PF00400) 949->987
BC1G_08570	Botrytis cinerea	NACHT domain (PF05729) 68->249
CHG01000	Chaetomium globosum	Phosphorylase superfamily (PF01048) 16->310, NACHT domain (PF05729) 417->635, WD domain, G-beta repeat (PF00400) 871->909, WD domain, G-beta repeat (PF00400) 913->951, WD domain, G-beta repeat (PF00400) 955->993, WD domain, G-beta repeat (PF00400) 997->1035, WD domain, G-beta repeat (PF00400) 1039->1077, WD domain, G-beta repeat (PF00400) 1081->1119, WD domain, G-beta repeat (PF00400) 1136->1159,…
CHG03034	Chaetomium globosum	NACHT domain (PF05729) 428->608, WD domain, G-beta repeat (PF00400) 887->925, WD domain, G-beta repeat (PF00400) 929->967, WD domain, G-beta repeat (PF00400) 971->1009, WD domain, G-beta repeat (PF00400) 1013->1051, WD domain, G-beta repeat (PF00400) 1055->1093, WD domain, G-beta repeat (PF00400) 1097->1122
CHG03076	Chaetomium globosum	NACHT domain (PF05729) 469->653
CHG04196	Chaetomium globosum	NACHT domain (PF05729) 148->335, WD domain, G-beta repeat (PF00400) 581->619, WD domain, G-beta repeat (PF00400) 623->661, WD domain, G-beta repeat (PF00400) 665->695
CHG08200	Chaetomium globosum	NACHT domain (PF05729) 450->630, WD domain, G-beta repeat (PF00400) 943->981, WD domain, G-beta repeat (PF00400) 985->1023, WD domain, G-beta repeat (PF00400) 1027->1065, WD domain, G-beta repeat (PF00400) 1069->1107, WD domain, G-beta repeat (PF00400) 1111->1149, WD domain, G-beta repeat (PF00400) 1153->1191, WD domain, G-beta repeat (PF00400) 1195->1233, WD domain, G-beta repeat (PF00400) 1237-…
CHG08852	Chaetomium globosum	NACHT domain (PF05729) 87->275, WD domain, G-beta repeat (PF00400) 419->457, WD domain, G-beta repeat (PF00400) 461->499, WD domain, G-beta repeat (PF00400) 503->541, WD domain, G-beta repeat (PF00400) 545->583, WD domain, G-beta repeat (PF00400) 587->625, WD domain, G-beta repeat (PF00400) 629->667
Cohe102777	Cochliobolus heterostrophus	Heterokaryon incompatibility protein (HET) (PF06985) 25->145, NACHT domain (PF05729) 299->497, WD domain, G-beta repeat (PF00400) 820->858, WD domain, G-beta repeat (PF00400) 862->900, WD domain, G-beta repeat (PF00400) 905->943, WD domain, G-beta repeat (PF00400) 947->985, WD domain, G-beta repeat (PF00400) 989->1027, WD domain, G-beta repeat (PF00400) 1031->1069, WD domain, G-beta repeat (PF004…
Cohe106331	Cochliobolus heterostrophus	Heterokaryon incompatibility protein (HET) (PF06985) 26->147, NACHT domain (PF05729) 297->489, WD domain, G-beta repeat (PF00400) 817->855, WD domain, G-beta repeat (PF00400) 859->897, WD domain, G-beta repeat (PF00400) 901->939, WD domain, G-beta repeat (PF00400) 943->981, WD domain, G-beta repeat (PF00400) 985->1024, WD domain, G-beta repeat (PF00400) 1028->1066, WD domain, G-beta repeat (PF004…
Cohe108573	Cochliobolus heterostrophus	Heterokaryon incompatibility protein (HET) (PF06985) 25->146, NACHT domain (PF05729) 296->479, WD domain, G-beta repeat (PF00400) 816->854, WD domain, G-beta repeat (PF00400) 858->896, WD domain, G-beta repeat (PF00400) 900->938, WD domain, G-beta repeat (PF00400) 942->980, WD domain, G-beta repeat (PF00400) 984->1022, WD domain, G-beta repeat (PF00400) 1026->1064, WD domain, G-beta repeat (PF004…
Cohe109614	Cochliobolus heterostrophus	Heterokaryon incompatibility protein (HET) (PF06985) 25->146, NACHT domain (PF05729) 295->495, WD domain, G-beta repeat (PF00400) 822->860, WD domain, G-beta repeat (PF00400) 864->902, WD domain, G-beta repeat (PF00400) 906->944, WD domain, G-beta repeat (PF00400) 948->986, WD domain, G-beta repeat (PF00400) 989->1027, WD domain, G-beta repeat (PF00400) 1031->1069, WD domain, G-beta repeat (PF004…
Cohe111779	Cochliobolus heterostrophus	Heterokaryon incompatibility protein (HET) (PF06985) 25->146, NACHT domain (PF05729) 296->491, WD domain, G-beta repeat (PF00400) 820->858, WD domain, G-beta repeat (PF00400) 862->900, WD domain, G-beta repeat (PF00400) 904->942, WD domain, G-beta repeat (PF00400) 946->984, WD domain, G-beta repeat (PF00400) 988->1026, WD domain, G-beta repeat (PF00400) 1032->1070, WD domain, G-beta repeat (PF004…
Cohe80452	Cochliobolus heterostrophus	Heterokaryon incompatibility protein (HET) (PF06985) 25->154, NACHT domain (PF05729) 304->475, WD domain, G-beta repeat (PF00400) 829->853, WD domain, G-beta repeat (PF00400) 857->895, WD domain, G-beta repeat (PF00400) 899->937, WD domain, G-beta repeat (PF00400) 941->978, WD domain, G-beta repeat (PF00400) 982->1020, WD domain, G-beta repeat (PF00400) 1024->1062
Cohe97312	Cochliobolus heterostrophus	Heterokaryon incompatibility protein (HET) (PF06985) 25->144, NACHT domain (PF05729) 294->484, WD domain, G-beta repeat (PF00400) 819->857, WD domain, G-beta repeat (PF00400) 861->899, WD domain, G-beta repeat (PF00400) 903->941, WD domain, G-beta repeat (PF00400) 1034->1072, WD domain, G-beta repeat (PF00400) 1076->1114, WD domain, G-beta repeat (PF00400) 1118->1156, WD domain, G-beta repeat (PF…
FGSG_00205	Fusarium graminearum	NACHT domain (PF05729) 358->475, WD domain, G-beta repeat (PF00400) 778->816, WD domain, G-beta repeat (PF00400) 843->863, WD domain, G-beta repeat (PF00400) 961->985
FGSG_02557	Fusarium graminearum	NACHT domain (PF05729) 100->283
FGSG_08113	Fusarium graminearum	NACHT domain (PF05729) 38->192
FGSG_08144	Fusarium graminearum	NACHT domain (PF05729) 92->268
FGSG_10601	Fusarium graminearum	NACHT domain (PF05729) 80->199, WD domain, G-beta repeat (PF00400) 600->638, WD domain, G-beta repeat (PF00400) 771->809, WD domain, G-beta repeat (PF00400) 895->933, WD domain, G-beta repeat (PF00400) 937->974, WD domain, G-beta repeat (PF00400) 978->1016
FGSG_11067	Fusarium graminearum	NACHT domain (PF05729) 359->538, WD domain, G-beta repeat (PF00400) 965->1002
FGSG_13479	Fusarium graminearum	NACHT domain (PF05729) 28->191, PBS lyase HEAT-like repeat (PF03130) 482->510, PBS lyase HEAT-like repeat (PF03130) 647->675, PBS lyase HEAT-like repeat (PF03130) 680->708, PBS lyase HEAT-like repeat (PF03130) 779->807
FOXG_04769	Fusarium oxysporum	NACHT domain (PF05729) 185->368, WD domain, G-beta repeat (PF00400) 627->665, WD domain, G-beta repeat (PF00400) 672->709, WD domain, G-beta repeat (PF00400) 712->750
FOXG_06454	Fusarium oxysporum	NACHT domain (PF05729) 50->222, WD domain, G-beta repeat (PF00400) 412->450, WD domain, G-beta repeat (PF00400) 454->492, WD domain, G-beta repeat (PF00400) 496->534, WD domain, G-beta repeat (PF00400) 538->576
FOXG_06809	Fusarium oxysporum	NACHT domain (PF05729) 116->288, WD domain, G-beta repeat (PF00400) 478->516, WD domain, G-beta repeat (PF00400) 520->558, WD domain, G-beta repeat (PF00400) 562->600, WD domain, G-beta repeat (PF00400) 604->642
FOXG_06947	Fusarium oxysporum	NACHT domain (PF05729) 185->353, WD domain, G-beta repeat (PF00400) 603->641, WD domain, G-beta repeat (PF00400) 645->683, WD domain, G-beta repeat (PF00400) 687->725
FOXG_07194	Fusarium oxysporum	Phosphorylase superfamily (PF01048) 49->307, NACHT domain (PF05729) 378->546, WD domain, G-beta repeat (PF00400) 902->930
FOXG_07369	Fusarium oxysporum	NACHT domain (PF05729) 116->288, WD domain, G-beta repeat (PF00400) 478->516, WD domain, G-beta repeat (PF00400) 520->558, WD domain, G-beta repeat (PF00400) 562->600, WD domain, G-beta repeat (PF00400) 604->642
FOXG_14903	Fusarium oxysporum	NACHT domain (PF05729) 391->568, WD domain, G-beta repeat (PF00400) 908->946
FOXG_17104	Fusarium oxysporum	NACHT domain (PF05729) 100->168
FOXG_17206	Fusarium oxysporum	NACHT domain (PF05729) 380->509, WD domain, G-beta repeat (PF00400) 913->951, WD domain, G-beta repeat (PF00400) 955->993, WD domain, G-beta repeat (PF00400) 1281->1318, WD domain, G-beta repeat (PF00400) 1382->1407
FOXG_17313	Fusarium oxysporum	NACHT domain (PF05729) 100->168
FVEG03427	Fusarium verticillioides	NACHT domain (PF05729) 96->278, WD domain, G-beta repeat (PF00400) 362->388, WD domain, G-beta repeat (PF00400) 392->430, WD domain, G-beta repeat (PF00400) 434->473
FVEG07672	Fusarium verticillioides	NACHT domain (PF05729) 398->586
FVEG13486	Fusarium verticillioides	NACHT domain (PF05729) 342->536
Myfi37472	Mycosphaerella fijiensis	NACHT domain (PF05729) 78->266
NCU09760	Neurospora crassa	NACHT domain (PF05729) 274->389, Ankyrin repeat (PF00023) 893->925, Ankyrin repeat (PF00023) 931->952, Ankyrin repeat (PF00023) 957->985, Ankyrin repeat (PF00023) 987->1015, Ankyrin repeat (PF00023) 1017->1040, Ankyrin repeat (PF00023) 1044->1077
NFIA001140	Neosartorya fischeri	Phosphorylase superfamily (PF01048) 10->308, NACHT domain (PF05729) 375->563, WD domain, G-beta repeat (PF00400) 888->926, WD domain, G-beta repeat (PF00400) 930->968, WD domain, G-beta repeat (PF00400) 972->1010, WD domain, G-beta repeat (PF00400) 1014->1052, WD domain, G-beta repeat (PF00400) 1056->1094, WD domain, G-beta repeat (PF00400) 1098->1136, WD domain, G-beta repeat (PF00400) 1140->117…
NFIA113170	Neosartorya fischeri	NACHT domain (PF05729) 459->640, WD domain, G-beta repeat (PF00400) 982->1020, WD domain, G-beta repeat (PF00400) 1024->1062, WD domain, G-beta repeat (PF00400) 1066->1104, WD domain, G-beta repeat (PF00400) 1108->1145, WD domain, G-beta repeat (PF00400) 1149->1187, WD domain, G-beta repeat (PF00400) 1191->1229, WD domain, G-beta repeat (PF00400) 1233->1271, WD domain, G-beta repeat (PF00400) 128…
NFIA113460	Neosartorya fischeri	NACHT domain (PF05729) 393->577, WD domain, G-beta repeat (PF00400) 939->976, WD domain, G-beta repeat (PF00400) 980->1017, WD domain, G-beta repeat (PF00400) 1144->1182, WD domain, G-beta repeat (PF00400) 1227->1264, WD domain, G-beta repeat (PF00400) 1349->1387
Neha40379	Nectria haematococca	NACHT domain (PF05729) 91->273
Neha48128	Nectria haematococca	NACHT domain (PF05729) 78->256, WD domain, G-beta repeat (PF00400) 601->639, WD domain, G-beta repeat (PF00400) 643->681, WD domain, G-beta repeat (PF00400) 685->723, WD domain, G-beta repeat (PF00400) 727->765, WD domain, G-beta repeat (PF00400) 769->807, WD domain, G-beta repeat (PF00400) 811->849, WD domain, G-beta repeat (PF00400) 853->891, WD domain, G-beta repeat (PF00400) 895->933, WD doma…
Neha52111	Nectria haematococca	NACHT domain (PF05729) 57->248, WD domain, G-beta repeat (PF00400) 574->611, WD domain, G-beta repeat (PF00400) 654->691, WD domain, G-beta repeat (PF00400) 696->733, WD domain, G-beta repeat (PF00400) 737->774, WD domain, G-beta repeat (PF00400) 782->819, WD domain, G-beta repeat (PF00400) 822->860, WD domain, G-beta repeat (PF00400) 874->912, WD domain, G-beta repeat (PF00400) 932->954
Neha70532	Nectria haematococca	NACHT domain (PF05729) 100->294, WD domain, G-beta repeat (PF00400) 577->615, WD domain, G-beta repeat (PF00400) 756->794
Neha77314	Nectria haematococca	NACHT domain (PF05729) 79->260, WD domain, G-beta repeat (PF00400) 593->633, WD domain, G-beta repeat (PF00400) 825->849
Neha89121	Nectria haematococca	NACHT domain (PF05729) 377->543, WD domain, G-beta repeat (PF00400) 868->906, WD domain, G-beta repeat (PF00400) 910->948, WD domain, G-beta repeat (PF00400) 952->990, WD domain, G-beta repeat (PF00400) 994->1032, WD domain, G-beta repeat (PF00400) 1036->1074, WD domain, G-beta repeat (PF00400) 1078->1116
Pa_2_6680	Podospora anserina	Heterokaryon incompatibility protein (HET) (PF06985) 25->141, NACHT domain (PF05729) 294->458, WD domain, G-beta repeat (PF00400) 810->848, WD domain, G-beta repeat (PF00400) 852->890, WD domain, G-beta repeat (PF00400) 894->932
Pa_2_7940	Podospora anserina	Heterokaryon incompatibility protein (HET) (PF06985) 26->143, NACHT domain (PF05729) 293->463, WD domain, G-beta repeat (PF00400) 821->859, WD domain, G-beta repeat (PF00400) 863->901, WD domain, G-beta repeat (PF00400) 905->943, WD domain, G-beta repeat (PF00400) 947->985, WD domain, G-beta repeat (PF00400) 989->1027, WD domain, G-beta repeat (PF00400) 1031->1062
Pa_3_10930	Podospora anserina	NACHT domain (PF05729) 380->562, WD domain, G-beta repeat (PF00400) 868->906, WD domain, G-beta repeat (PF00400) 910->948, WD domain, G-beta repeat (PF00400) 952->990, WD domain, G-beta repeat (PF00400) 994->1032, WD domain, G-beta repeat (PF00400) 1036->1074, WD domain, G-beta repeat (PF00400) 1078->1116, WD domain, G-beta repeat (PF00400) 1120->1158, WD domain, G-beta repeat (PF00400) 1162->1200
Pa_3_8260	Podospora anserina	NACHT domain (PF05729) 137->212
Pa_4_1190	Podospora anserina	Heterokaryon incompatibility protein (HET) (PF06985) 26->142, NACHT domain (PF05729) 292->476, WD domain, G-beta repeat (PF00400) 821->859, WD domain, G-beta repeat (PF00400) 863->901, WD domain, G-beta repeat (PF00400) 905->943, WD domain, G-beta repeat (PF00400) 947->985, WD domain, G-beta repeat (PF00400) 1008->1046, WD domain, G-beta repeat (PF00400) 1050->1088, WD domain, G-beta repeat (PF00…
Pa_4_1920	Podospora anserina	Heterokaryon incompatibility protein (HET) (PF06985) 26->144, NACHT domain (PF05729) 294->488, WD domain, G-beta repeat (PF00400) 831->869, WD domain, G-beta repeat (PF00400) 873->911, WD domain, G-beta repeat (PF00400) 915->953
Pa_5_3370	Podospora anserina	NACHT domain (PF05729) 226->428, WD domain, G-beta repeat (PF00400) 745->783, WD domain, G-beta repeat (PF00400) 787->825, WD domain, G-beta repeat (PF00400) 829->867, WD domain, G-beta repeat (PF00400) 871->909, WD domain, G-beta repeat (PF00400) 913->951, WD domain, G-beta repeat (PF00400) 973->1000
Pa_6_7270	Podospora anserina	NACHT domain (PF05729) 459->625
Pa_7_3110	Podospora anserina	Heterokaryon incompatibility protein (HET) (PF06985) 26->144, NACHT domain (PF05729) 305->487, WD domain, G-beta repeat (PF00400) 829->867, WD domain, G-beta repeat (PF00400) 871->909, WD domain, G-beta repeat (PF00400) 913->951, WD domain, G-beta repeat (PF00400) 955->993, WD domain, G-beta repeat (PF00400) 997->1035, WD domain, G-beta repeat (PF00400) 1039->1077, WD domain, G-beta repeat (PF004…
SNU02097	Stagonospora nodorum	Metallo-beta-lactamase superfamily (PF00753) 145->205, NACHT domain (PF05729) 526->697
SS1G_04917	Sclerotinia sclerotiorum	NACHT domain (PF05729) 282->463, WD domain, G-beta repeat (PF00400) 798->836, WD domain, G-beta repeat (PF00400) 840->878, WD domain, G-beta repeat (PF00400) 882->920, WD domain, G-beta repeat (PF00400) 924->962, Reverse transcriptase (RNA-dependent DNA polymerase) (PF00078) 1005->1201, RNase H (PF00075) 1513->1551
SS1G_05486	Sclerotinia sclerotiorum	Heterokaryon incompatibility protein (HET) (PF06985) 77->196, NACHT domain (PF05729) 348->528
SS1G_05532	Sclerotinia sclerotiorum	Heterokaryon incompatibility protein (HET) (PF06985) 26->145, NACHT domain (PF05729) 297->477, WD domain, G-beta repeat (PF00400) 702->740, WD domain, G-beta repeat (PF00400) 744->782, WD domain, G-beta repeat (PF00400) 786->824, WD domain, G-beta repeat (PF00400) 828->866, WD domain, G-beta repeat (PF00400) 870->908, WD domain, G-beta repeat (PF00400) 912->950, WD domain, G-beta repeat (PF00400)…
SS1G_07150	Sclerotinia sclerotiorum	Heterokaryon incompatibility protein (HET) (PF06985) 26->145, NACHT domain (PF05729) 303->484
Trat10225	Trichoderma atoviride	NACHT domain (PF05729) 305->486
Trat10312	Trichoderma atoviride	NACHT domain (PF05729) 48->229, WD domain, G-beta repeat (PF00400) 568->606, WD domain, G-beta repeat (PF00400) 610->648, WD domain, G-beta repeat (PF00400) 652->690, WD domain, G-beta repeat (PF00400) 694->731, WD domain, G-beta repeat (PF00400) 825->863
Trat10362	Trichoderma atoviride	NACHT domain (PF05729) 46->224, WD domain, G-beta repeat (PF00400) 562->600, WD domain, G-beta repeat (PF00400) 644->682, WD domain, G-beta repeat (PF00400) 778->816, WD domain, G-beta repeat (PF00400) 820->858
Trat10375	Trichoderma atoviride	NACHT domain (PF05729) 61->241, WD domain, G-beta repeat (PF00400) 587->625
Trat10695	Trichoderma atoviride	NACHT domain (PF05729) 51->232, WD domain, G-beta repeat (PF00400) 581->619, WD domain, G-beta repeat (PF00400) 623->661, WD domain, G-beta repeat (PF00400) 664->702
Trat157465	Trichoderma atoviride	NACHT domain (PF05729) 52->239, WD domain, G-beta repeat (PF00400) 588->618, WD domain, G-beta repeat (PF00400) 622->660, WD domain, G-beta repeat (PF00400) 664->702, WD domain, G-beta repeat (PF00400) 706->744
Trat21120	Trichoderma atoviride	NACHT domain (PF05729) 50->231
Trat33537	Trichoderma atoviride	NACHT domain (PF05729) 55->244, WD domain, G-beta repeat (PF00400) 591->628, WD domain, G-beta repeat (PF00400) 632->669, WD domain, G-beta repeat (PF00400) 673->710, WD domain, G-beta repeat (PF00400) 756->793, WD domain, G-beta repeat (PF00400) 797->834, WD domain, G-beta repeat (PF00400) 838->875, WD domain, G-beta repeat (PF00400) 879->917, WD domain, G-beta repeat (PF00400) 921->959, WD doma…
Trat38238	Trichoderma atoviride	NACHT domain (PF05729) 48->251, WD domain, G-beta repeat (PF00400) 572->610
Trat38500	Trichoderma atoviride	NACHT domain (PF05729) 87->271, WD domain, G-beta repeat (PF00400) 617->654, WD domain, G-beta repeat (PF00400) 660->697, WD domain, G-beta repeat (PF00400) 700->737, WD domain, G-beta repeat (PF00400) 756->777, WD domain, G-beta repeat (PF00400) 781->818, WD domain, G-beta repeat (PF00400) 833->858, WD domain, G-beta repeat (PF00400) 862->900, WD domain, G-beta repeat (PF00400) 999->1037
Trat42976	Trichoderma atoviride	NACHT domain (PF05729) 55->240, WD domain, G-beta repeat (PF00400) 589->626, WD domain, G-beta repeat (PF00400) 630->672, WD domain, G-beta repeat (PF00400) 676->713, WD domain, G-beta repeat (PF00400) 717->754, WD domain, G-beta repeat (PF00400) 758->795, WD domain, G-beta repeat (PF00400) 799->836, WD domain, G-beta repeat (PF00400) 842->879, WD domain, G-beta repeat (PF00400) 882->920, WD doma…
Trat45632	Trichoderma atoviride	NACHT domain (PF05729) 389->578, WD domain, G-beta repeat (PF00400) 911->948, WD domain, G-beta repeat (PF00400) 952->990, WD domain, G-beta repeat (PF00400) 994->1032, WD domain, G-beta repeat (PF00400) 1036->1074, WD domain, G-beta repeat (PF00400) 1078->1118, WD domain, G-beta repeat (PF00400) 1137->1160, WD domain, G-beta repeat (PF00400) 1164->1202, WD domain, G-beta repeat (PF00400) 1314->1…
Trat51494	Trichoderma atoviride	NACHT domain (PF05729) 85->274, WD domain, G-beta repeat (PF00400) 623->661, WD domain, G-beta repeat (PF00400) 716->753, WD domain, G-beta repeat (PF00400) 757->794
Trat51562	Trichoderma atoviride	NACHT domain (PF05729) 408->572, HEAT repeat (PF02985) 1062->1098, HEAT repeat (PF02985) 1128->1164
Trat53809	Trichoderma atoviride	NACHT domain (PF05729) 56->242, WD domain, G-beta repeat (PF00400) 583->621, WD domain, G-beta repeat (PF00400) 625->664, WD domain, G-beta repeat (PF00400) 668->707, WD domain, G-beta repeat (PF00400) 711->749
Trat53982	Trichoderma atoviride	NACHT domain (PF05729) 41->225, WD domain, G-beta repeat (PF00400) 576->614, WD domain, G-beta repeat (PF00400) 833->871, WD domain, G-beta repeat (PF00400) 916->953
Trat84025	Trichoderma atoviride	NACHT domain (PF05729) 259->448
Trat88849	Trichoderma atoviride	NACHT domain (PF05729) 87->269, WD domain, G-beta repeat (PF00400) 892->930, WD domain, G-beta repeat (PF00400) 954->976, WD domain, G-beta repeat (PF00400) 1033->1054
Trre104359	Trichoderma reesei	NACHT domain (PF05729) 432->620, WD domain, G-beta repeat (PF00400) 1220->1258
Trre105330	Trichoderma reesei	NACHT domain (PF05729) 426->615, WD domain, G-beta repeat (PF00400) 1215->1238
Trre56211	Trichoderma reesei	NACHT domain (PF05729) 95->273
Trre58814	Trichoderma reesei	NACHT domain (PF05729) 61->246, WD domain, G-beta repeat (PF00400) 713->750, WD domain, G-beta repeat (PF00400) 837->877, WD domain, G-beta repeat (PF00400) 881->919, WD domain, G-beta repeat (PF00400) 923->962
Trre62121	Trichoderma reesei	NACHT domain (PF05729) 51->230, WD domain, G-beta repeat (PF00400) 569->607, WD domain, G-beta repeat (PF00400) 611->647, WD domain, G-beta repeat (PF00400) 878->915
Trre63240	Trichoderma reesei	NACHT domain (PF05729) 52->237, WD domain, G-beta repeat (PF00400) 575->613, WD domain, G-beta repeat (PF00400) 617->655, WD domain, G-beta repeat (PF00400) 659->696, WD domain, G-beta repeat (PF00400) 700->737, WD domain, G-beta repeat (PF00400) 741->778, WD domain, G-beta repeat (PF00400) 782->820, WD domain, G-beta repeat (PF00400) 824->861, WD domain, G-beta repeat (PF00400) 865->903, WD doma…
Trre63909	Trichoderma reesei	NACHT domain (PF05729) 100->262
Trre65771	Trichoderma reesei	NACHT domain (PF05729) 70->263, WD domain, G-beta repeat (PF00400) 587->625, WD domain, G-beta repeat (PF00400) 657->679, WD domain, G-beta repeat (PF00400) 683->721
Trvi10187	Trichoderma virens	NACHT domain (PF05729) 305->483
Trvi10230	Trichoderma virens	NACHT domain (PF05729) 48->232, WD domain, G-beta repeat (PF00400) 584->622, WD domain, G-beta repeat (PF00400) 626->664, WD domain, G-beta repeat (PF00400) 668->706, WD domain, G-beta repeat (PF00400) 710->748, WD domain, G-beta repeat (PF00400) 752->786, WD domain, G-beta repeat (PF00400) 790->827, WD domain, G-beta repeat (PF00400) 873->909, WD domain, G-beta repeat (PF00400) 913->953, WD doma…
Trvi10726	Trichoderma virens	NACHT domain (PF05729) 52->244, WD domain, G-beta repeat (PF00400) 589->627, WD domain, G-beta repeat (PF00400) 810->849
Trvi20326	Trichoderma virens	NACHT domain (PF05729) 51->230, WD domain, G-beta repeat (PF00400) 581->619, WD domain, G-beta repeat (PF00400) 623->660, WD domain, G-beta repeat (PF00400) 680->706, WD domain, G-beta repeat (PF00400) 710->748, WD domain, G-beta repeat (PF00400) 752->791, WD domain, G-beta repeat (PF00400) 794->832, WD domain, G-beta repeat (PF00400) 840->876, WD domain, G-beta repeat (PF00400) 880->915, WD doma…
Trvi20328	Trichoderma virens	NACHT domain (PF05729) 52->235, WD domain, G-beta repeat (PF00400) 577->615, WD domain, G-beta repeat (PF00400) 619->657, WD domain, G-beta repeat (PF00400) 661->698, WD domain, G-beta repeat (PF00400) 702->739, WD domain, G-beta repeat (PF00400) 743->780, WD domain, G-beta repeat (PF00400) 784->821, WD domain, G-beta repeat (PF00400) 825->859, WD domain, G-beta repeat (PF00400) 869->907, WD doma…
Trvi20335	Trichoderma virens	NACHT domain (PF05729) 48->229, WD domain, G-beta repeat (PF00400) 567->604, WD domain, G-beta repeat (PF00400) 609->647, WD domain, G-beta repeat (PF00400) 651->689, WD domain, G-beta repeat (PF00400) 693->728, WD domain, G-beta repeat (PF00400) 775->813, WD domain, G-beta repeat (PF00400) 902->930, WD domain, G-beta repeat (PF00400) 994->1032
Trvi20338	Trichoderma virens	NACHT domain (PF05729) 52->231, WD domain, G-beta repeat (PF00400) 572->610, WD domain, G-beta repeat (PF00400) 873->910
Trvi20368	Trichoderma virens	NACHT domain (PF05729) 51->239, WD domain, G-beta repeat (PF00400) 582->620, WD domain, G-beta repeat (PF00400) 624->662, WD domain, G-beta repeat (PF00400) 666->704, WD domain, G-beta repeat (PF00400) 708->746, WD domain, G-beta repeat (PF00400) 750->788, WD domain, G-beta repeat (PF00400) 792->830, WD domain, G-beta repeat (PF00400) 834->872, WD domain, G-beta repeat (PF00400) 877->914
Trvi20627	Trichoderma virens	NACHT domain (PF05729) 48->250, WD domain, G-beta repeat (PF00400) 566->604
Trvi34811	Trichoderma virens	NACHT domain (PF05729) 83->272, WD domain, G-beta repeat (PF00400) 613->651, WD domain, G-beta repeat (PF00400) 735->773, WD domain, G-beta repeat (PF00400) 818->856, WD domain, G-beta repeat (PF00400) 872->896, WD domain, G-beta repeat (PF00400) 950->987
Trvi36308	Trichoderma virens	NACHT domain (PF05729) 122->283
Trvi39023	Trichoderma virens	NACHT domain (PF05729) 88->268, WD domain, G-beta repeat (PF00400) 614->652, WD domain, G-beta repeat (PF00400) 656->693, WD domain, G-beta repeat (PF00400) 738->776, WD domain, G-beta repeat (PF00400) 780->818, WD domain, G-beta repeat (PF00400) 822->860, WD domain, G-beta repeat (PF00400) 864->902, WD domain, G-beta repeat (PF00400) 906->944, WD domain, G-beta repeat (PF00400) 948->986
Trvi42912	Trichoderma virens	NACHT domain (PF05729) 41->208
Trvi46863	Trichoderma virens	NACHT domain (PF05729) 69->250, WD domain, G-beta repeat (PF00400) 593->631, WD domain, G-beta repeat (PF00400) 635->673, WD domain, G-beta repeat (PF00400) 677->715, WD domain, G-beta repeat (PF00400) 719->759, WD domain, G-beta repeat (PF00400) 763->801, WD domain, G-beta repeat (PF00400) 805->842, WD domain, G-beta repeat (PF00400) 845->883, WD domain, G-beta repeat (PF00400) 887->925, WD doma…
Trvi46923	Trichoderma virens	NACHT domain (PF05729) 90->277, WD domain, G-beta repeat (PF00400) 623->661, WD domain, G-beta repeat (PF00400) 665->703, WD domain, G-beta repeat (PF00400) 707->745, WD domain, G-beta repeat (PF00400) 749->787, WD domain, G-beta repeat (PF00400) 791->829, WD domain, G-beta repeat (PF00400) 833->871, WD domain, G-beta repeat (PF00400) 875->913, WD domain, G-beta repeat (PF00400) 917->955, WD doma…
Trvi49087	Trichoderma virens	NACHT domain (PF05729) 67->255, WD domain, G-beta repeat (PF00400) 728->765, WD domain, G-beta repeat (PF00400) 863->901, WD domain, G-beta repeat (PF00400) 905->943, WD domain, G-beta repeat (PF00400) 947->985, WD domain, G-beta repeat (PF00400) 1010->1035
Trvi68188	Trichoderma virens	NACHT domain (PF05729) 89->252, WD domain, G-beta repeat (PF00400) 469->507, WD domain, G-beta repeat (PF00400) 511->548, WD domain, G-beta repeat (PF00400) 552->590, WD domain, G-beta repeat (PF00400) 594->631, WD domain, G-beta repeat (PF00400) 635->672, WD domain, G-beta repeat (PF00400) 676->713, WD domain, G-beta repeat (PF00400) 717->755, WD domain, G-beta repeat (PF00400) 759->796, WD doma…
Trvi68851	Trichoderma virens	NACHT domain (PF05729) 408->573
Trvi69957	Trichoderma virens	NACHT domain (PF05729) 84->197
